# Supplementary material for: Epitranscriptomic N4-Acetylcytidine Profiling in CD4+ T Cells of Systemic Lupus Erythematosus
Source: Front Cell Dev Biol. 2020 Aug 28;8:842. doi: 10.3389/fcell.2020.00842 (PMC7483482; doi:10.3389/fcell.2020.00842)
Supplement: TABLE S2 — Most relevant networks. [file Table_2.xls]

## Sheet: Table S2
Supplementary Table 2. Most relevant networks.

## Sheet: Hyperacetylated
No	Network name	Processes	Size	Target	Pathways	p‑Value	zScore	gScore
1	ERK1/2, TOMM5, ZNF121, ZMAT1, POLR2J3	regulation of Golgi inheritance (4.7%), trachea formation (4.7%), transcription by RNA polymerase II (16.3%), transcription, DNA‑templated (18.6%), nucleic acid‑templated transcription (18.6%)	50	42	1	6.82e‑71	50.96	52.21
2	PHK beta, ZNF512B, SULT1B1, ZNF43, ZNF266	neurotransmitter receptor transport, postsynaptic endosome to lysosome (7.1%), cardiac conduction (11.9%), regulation of synaptic transmission, glutamatergic (11.9%), receptor diffusion trapping (7.1%), postsynaptic neurotransmitter receptor diffusion trapping (7.1%)	50	42	1	6.82e‑71	50.96	52.21
3	PIGC, CLEC2D, Carmil, SRB7, WDR46	positive regulation of T cell extravasation (8.7%), regulation of T cell extravasation (8.7%), galanin‑activated signaling pathway (6.5%), regulation of immunological synapse formation (6.5%), transcription by RNA polymerase II (21.7%)	50	34	0	6.13e‑52	41.09	41.09

## Sheet: Hypoacetylated
No	Network name	Processes	Size	Target	Pathways	p‑Value	zScore	gScore
1	TAK1(MAP3K7), TRAF2, IKK‑beta, TLR2, NF‑kB1 (p105)	I‑kappaB kinase/NF‑kappaB signaling (50.0%), pattern recognition receptor signaling pathway (52.1%), positive regulation of multi‑organism process (70.8%), positive regulation of response to external stimulus (72.9%), positive regulation of NF‑kappaB transcription factor activity (52.1%)	52	26	13	1.84e‑34	29.78	46.03
2	WDR40A, LYRM2, Myosin IG, FAM3A, Neuregulin 4	presynaptic membrane assembly (8.5%), presynaptic membrane organization (8.5%), postsynaptic membrane assembly (8.5%), neuron cell‑cell adhesion (8.5%), postsynapse assembly (8.5%)	50	34	0	2.24e‑51	40.04	40.04
3	Tecta, SNX4, ZBTB39, VDB, NUDT4P1	regulation of male germ cell proliferation (6.4%), regulation of germ cell proliferation (6.4%), positive regulation of gamma‑aminobutyric acid secretion (6.4%), inter‑Golgi cisterna vesicle‑mediated transport (4.3%), regulation of gamma‑aminobutyric acid secretion (6.4%)	52	33	0	9.57e‑49	38.43	38.43
