# Supplementary material for: Epitranscriptomic N4-Acetylcytidine Profiling in CD4+ T Cells of Systemic Lupus Erythematosus
Source: Front Cell Dev Biol. 2020 Aug 28;8:842. doi: 10.3389/fcell.2020.00842 (PMC7483482; doi:10.3389/fcell.2020.00842)
Supplement: TABLE S4 — Biological process and pathway categories of DEGs with ac4C hyper or hypo. [file Table_4.XLS]

## Sheet: Hyper-Up
Supplementary Table 4. Biological process and pathway categories of DEGs with ac4C hyper or hypo.
ac4C Hyper-Up gene set.
GroupID	Category	Term	Description	LogP	Log(q-value)	InTerm_InList	Genes	Symbols
1_Summary	GO Biological Processes	GO:0002274	myeloid leukocyte activation	-16.9738	-12.6547	29/656	302,671,683,728,847,967,1512,2219,2896,2950,3162,3417,3717,4048,5199,5315,5359,5836,5879,6386,8291,22918,25840,29108,51311,55313,79895,160364,100049587,334,8775,9381,11261,54863,4064,4602	ANXA2,BPI,BST1,C5AR1,CAT,CD63,CTSH,FCN1,GRN,GSTP1,HMOX1,IDH1,JAK2,LTA4H,CFP,PKM,PLSCR1,PYGL,RAC1,SDCBP,DYSF,CD93,METTL7A,PYCARD,TLR8,CPPED1,ATP8B4,CLEC12A,SIGLEC14,APLP2,NAPA,OTOF,CHP1,TOR4A,CD180,MYB
1_Member	GO Biological Processes	GO:0002274	myeloid leukocyte activation	-16.9738	-12.6547	29/656	302,671,683,728,847,967,1512,2219,2896,2950,3162,3417,3717,4048,5199,5315,5359,5836,5879,6386,8291,22918,25840,29108,51311,55313,79895,160364,100049587	ANXA2,BPI,BST1,C5AR1,CAT,CD63,CTSH,FCN1,GRN,GSTP1,HMOX1,IDH1,JAK2,LTA4H,CFP,PKM,PLSCR1,PYGL,RAC1,SDCBP,DYSF,CD93,METTL7A,PYCARD,TLR8,CPPED1,ATP8B4,CLEC12A,SIGLEC14
1_Member	GO Biological Processes	GO:0002275	myeloid cell activation involved in immune response	-15.95	-11.9319	26/547	302,671,683,728,847,967,1512,2219,2896,2950,3162,3417,4048,5199,5315,5836,5879,6386,8291,22918,25840,29108,55313,79895,160364,100049587	ANXA2,BPI,BST1,C5AR1,CAT,CD63,CTSH,FCN1,GRN,GSTP1,HMOX1,IDH1,LTA4H,CFP,PKM,PYGL,RAC1,SDCBP,DYSF,CD93,METTL7A,PYCARD,CPPED1,ATP8B4,CLEC12A,SIGLEC14
1_Member	GO Biological Processes	GO:0045055	regulated exocytosis	-15.6826	-11.8406	30/796	302,334,671,683,728,847,967,1512,2219,2896,2950,3162,3417,4048,5199,5315,5836,5879,6386,8775,9381,11261,22918,25840,29108,54863,55313,79895,160364,100049587	ANXA2,APLP2,BPI,BST1,C5AR1,CAT,CD63,CTSH,FCN1,GRN,GSTP1,HMOX1,IDH1,LTA4H,CFP,PKM,PYGL,RAC1,SDCBP,NAPA,OTOF,CHP1,CD93,METTL7A,PYCARD,TOR4A,CPPED1,ATP8B4,CLEC12A,SIGLEC14
1_Member	Reactome Gene Sets	R-HSA-6798695	neutrophil degranulation	-15.2087	-11.6243	24/480	302,671,683,728,847,967,1512,2219,2896,2950,3417,4048,5199,5315,5836,5879,6386,22918,25840,29108,55313,79895,160364,100049587	ANXA2,BPI,BST1,C5AR1,CAT,CD63,CTSH,FCN1,GRN,GSTP1,IDH1,LTA4H,CFP,PKM,PYGL,RAC1,SDCBP,CD93,METTL7A,PYCARD,CPPED1,ATP8B4,CLEC12A,SIGLEC14
1_Member	GO Biological Processes	GO:0043299	leukocyte degranulation	-15.1248	-11.6243	25/537	302,671,683,728,847,967,1512,2219,2896,2950,3162,3417,4048,5199,5315,5836,5879,6386,22918,25840,29108,55313,79895,160364,100049587	ANXA2,BPI,BST1,C5AR1,CAT,CD63,CTSH,FCN1,GRN,GSTP1,HMOX1,IDH1,LTA4H,CFP,PKM,PYGL,RAC1,SDCBP,CD93,METTL7A,PYCARD,CPPED1,ATP8B4,CLEC12A,SIGLEC14
1_Member	GO Biological Processes	GO:0002366	leukocyte activation involved in immune response	-15.0982	-11.6243	28/711	302,671,683,728,847,967,1512,2219,2896,2950,3162,3417,4048,4064,4602,5199,5315,5836,5879,6386,8291,22918,25840,29108,55313,79895,160364,100049587	ANXA2,BPI,BST1,C5AR1,CAT,CD63,CTSH,FCN1,GRN,GSTP1,HMOX1,IDH1,LTA4H,CD180,MYB,CFP,PKM,PYGL,RAC1,SDCBP,DYSF,CD93,METTL7A,PYCARD,CPPED1,ATP8B4,CLEC12A,SIGLEC14
1_Member	GO Biological Processes	GO:0043312	neutrophil degranulation	-15.0484	-11.6243	24/488	302,671,683,728,847,967,1512,2219,2896,2950,3417,4048,5199,5315,5836,5879,6386,22918,25840,29108,55313,79895,160364,100049587	ANXA2,BPI,BST1,C5AR1,CAT,CD63,CTSH,FCN1,GRN,GSTP1,IDH1,LTA4H,CFP,PKM,PYGL,RAC1,SDCBP,CD93,METTL7A,PYCARD,CPPED1,ATP8B4,CLEC12A,SIGLEC14
1_Member	GO Biological Processes	GO:0002263	cell activation involved in immune response	-15.0366	-11.6243	28/715	302,671,683,728,847,967,1512,2219,2896,2950,3162,3417,4048,4064,4602,5199,5315,5836,5879,6386,8291,22918,25840,29108,55313,79895,160364,100049587	ANXA2,BPI,BST1,C5AR1,CAT,CD63,CTSH,FCN1,GRN,GSTP1,HMOX1,IDH1,LTA4H,CD180,MYB,CFP,PKM,PYGL,RAC1,SDCBP,DYSF,CD93,METTL7A,PYCARD,CPPED1,ATP8B4,CLEC12A,SIGLEC14
1_Member	GO Biological Processes	GO:0002283	neutrophil activation involved in immune response	-14.9891	-11.6243	24/491	302,671,683,728,847,967,1512,2219,2896,2950,3417,4048,5199,5315,5836,5879,6386,22918,25840,29108,55313,79895,160364,100049587	ANXA2,BPI,BST1,C5AR1,CAT,CD63,CTSH,FCN1,GRN,GSTP1,IDH1,LTA4H,CFP,PKM,PYGL,RAC1,SDCBP,CD93,METTL7A,PYCARD,CPPED1,ATP8B4,CLEC12A,SIGLEC14
1_Member	GO Biological Processes	GO:0002444	myeloid leukocyte mediated immunity	-14.7953	-11.5352	25/555	302,671,683,728,847,967,1512,2219,2896,2950,3162,3417,4048,5199,5315,5836,5879,6386,22918,25840,29108,55313,79895,160364,100049587	ANXA2,BPI,BST1,C5AR1,CAT,CD63,CTSH,FCN1,GRN,GSTP1,HMOX1,IDH1,LTA4H,CFP,PKM,PYGL,RAC1,SDCBP,CD93,METTL7A,PYCARD,CPPED1,ATP8B4,CLEC12A,SIGLEC14
1_Member	GO Biological Processes	GO:0042119	neutrophil activation	-14.7943	-11.5352	24/501	302,671,683,728,847,967,1512,2219,2896,2950,3417,4048,5199,5315,5836,5879,6386,22918,25840,29108,55313,79895,160364,100049587	ANXA2,BPI,BST1,C5AR1,CAT,CD63,CTSH,FCN1,GRN,GSTP1,IDH1,LTA4H,CFP,PKM,PYGL,RAC1,SDCBP,CD93,METTL7A,PYCARD,CPPED1,ATP8B4,CLEC12A,SIGLEC14
1_Member	GO Biological Processes	GO:0002446	neutrophil mediated immunity	-14.7751	-11.5352	24/502	302,671,683,728,847,967,1512,2219,2896,2950,3417,4048,5199,5315,5836,5879,6386,22918,25840,29108,55313,79895,160364,100049587	ANXA2,BPI,BST1,C5AR1,CAT,CD63,CTSH,FCN1,GRN,GSTP1,IDH1,LTA4H,CFP,PKM,PYGL,RAC1,SDCBP,CD93,METTL7A,PYCARD,CPPED1,ATP8B4,CLEC12A,SIGLEC14
1_Member	GO Biological Processes	GO:0036230	granulocyte activation	-14.6796	-11.4744	24/507	302,671,683,728,847,967,1512,2219,2896,2950,3417,4048,5199,5315,5836,5879,6386,22918,25840,29108,55313,79895,160364,100049587	ANXA2,BPI,BST1,C5AR1,CAT,CD63,CTSH,FCN1,GRN,GSTP1,IDH1,LTA4H,CFP,PKM,PYGL,RAC1,SDCBP,CD93,METTL7A,PYCARD,CPPED1,ATP8B4,CLEC12A,SIGLEC14
2_Summary	Canonical Pathways	M135	PID IL5 pathway	-7.93244	-4.75946	5/14	1154,1439,3717,5292,6386,302,998,1230,2950,3162,5714,7357,8986,11274,29108,84888,5606,5778	CISH,CSF2RB,JAK2,PIM1,SDCBP,ANXA2,CDC42,CCR1,GSTP1,HMOX1,PSMD8,UGCG,RPS6KA4,USP18,PYCARD,SPPL2A,MAP2K3,PTPN7
2_Member	Canonical Pathways	M135	PID IL5 pathway	-7.93244	-4.75946	5/14	1154,1439,3717,5292,6386	CISH,CSF2RB,JAK2,PIM1,SDCBP
2_Member	Canonical Pathways	M182	PID IL3 pathway	-4.76699	-2.04376	4/27	1154,1439,3717,5292	CISH,CSF2RB,JAK2,PIM1
2_Member	Canonical Pathways	M22	PID GMCSF pathway	-4.21096	-1.67435	4/37	1154,1439,3717,5292	CISH,CSF2RB,JAK2,PIM1
2_Member	GO Biological Processes	GO:0019221	cytokine-mediated signaling pathway	-4.21067	-1.67435	15/796	302,998,1154,1230,1439,2950,3162,3717,5292,5714,7357,8986,11274,29108,84888	ANXA2,CDC42,CISH,CCR1,CSF2RB,GSTP1,HMOX1,JAK2,PIM1,PSMD8,UGCG,RPS6KA4,USP18,PYCARD,SPPL2A
2_Member	Reactome Gene Sets	R-HSA-449147	signaling by interleukins	-4.09193	-1.60533	11/461	302,998,1154,1230,1439,3162,3717,5292,5606,5714,5778	ANXA2,CDC42,CISH,CCR1,CSF2RB,HMOX1,JAK2,PIM1,MAP2K3,PSMD8,PTPN7
3_Summary	GO Biological Processes	GO:0007015	actin filament organization	-6.7056	-3.56259	14/426	822,998,3717,4643,5879,7408,7791,10152,29108,51734,55160,91663,133522,203228,2876,4193,11261,683,6386,302,2896,4602,8986,10645,3162,3783,2048,8775	CAPG,CDC42,JAK2,MYO1E,RAC1,VASP,ZYX,ABI2,PYCARD,MSRB1,ARHGEF10L,MYADM,PPARGC1B,C9orf72,GPX1,MDM2,CHP1,BST1,SDCBP,ANXA2,GRN,MYB,RPS6KA4,CAMKK2,HMOX1,KCNN4,EPHB2,NAPA
3_Member	GO Biological Processes	GO:0007015	actin filament organization	-6.7056	-3.56259	14/426	822,998,3717,4643,5879,7408,7791,10152,29108,51734,55160,91663,133522,203228	CAPG,CDC42,JAK2,MYO1E,RAC1,VASP,ZYX,ABI2,PYCARD,MSRB1,ARHGEF10L,MYADM,PPARGC1B,C9orf72
3_Member	GO Biological Processes	GO:0097435	supramolecular fiber organization	-6.19272	-3.07774	17/698	822,998,2876,3717,4193,4643,5879,7408,7791,10152,11261,29108,51734,55160,91663,133522,203228	CAPG,CDC42,GPX1,JAK2,MDM2,MYO1E,RAC1,VASP,ZYX,ABI2,CHP1,PYCARD,MSRB1,ARHGEF10L,MYADM,PPARGC1B,C9orf72
3_Member	GO Biological Processes	GO:0030036	actin cytoskeleton organization	-5.56215	-2.65993	16/692	683,822,998,3717,4643,5879,6386,7408,7791,10152,29108,51734,55160,91663,133522,203228	BST1,CAPG,CDC42,JAK2,MYO1E,RAC1,SDCBP,VASP,ZYX,ABI2,PYCARD,MSRB1,ARHGEF10L,MYADM,PPARGC1B,C9orf72
3_Member	GO Biological Processes	GO:0030029	actin filament-based process	-4.8752	-2.10016	16/785	683,822,998,3717,4643,5879,6386,7408,7791,10152,29108,51734,55160,91663,133522,203228	BST1,CAPG,CDC42,JAK2,MYO1E,RAC1,SDCBP,VASP,ZYX,ABI2,PYCARD,MSRB1,ARHGEF10L,MYADM,PPARGC1B,C9orf72
3_Member	GO Biological Processes	GO:0030041	actin filament polymerization	-4.84077	-2.07797	8/188	822,3717,5879,7408,10152,29108,51734,91663	CAPG,JAK2,RAC1,VASP,ABI2,PYCARD,MSRB1,MYADM
3_Member	GO Biological Processes	GO:0110053	regulation of actin filament organization	-4.46059	-1.7947	9/276	822,998,5879,7408,10152,29108,55160,91663,203228	CAPG,CDC42,RAC1,VASP,ABI2,PYCARD,ARHGEF10L,MYADM,C9orf72
3_Member	GO Biological Processes	GO:0008154	actin polymerization or depolymerization	-4.43735	-1.78512	8/214	822,3717,5879,7408,10152,29108,51734,91663	CAPG,JAK2,RAC1,VASP,ABI2,PYCARD,MSRB1,MYADM
3_Member	GO Biological Processes	GO:0032956	regulation of actin cytoskeleton organization	-4.31749	-1.73875	10/359	683,822,998,5879,7408,10152,29108,55160,91663,203228	BST1,CAPG,CDC42,RAC1,VASP,ABI2,PYCARD,ARHGEF10L,MYADM,C9orf72
3_Member	GO Biological Processes	GO:1902903	regulation of supramolecular fiber organization	-4.20813	-1.67435	10/370	822,998,2876,5879,7408,10152,29108,55160,91663,203228	CAPG,CDC42,GPX1,RAC1,VASP,ABI2,PYCARD,ARHGEF10L,MYADM,C9orf72
3_Member	GO Biological Processes	GO:0010638	positive regulation of organelle organization	-4.02548	-1.56371	13/641	302,822,998,2896,4602,5879,6386,7408,8986,10152,10645,29108,55160	ANXA2,CAPG,CDC42,GRN,MYB,RAC1,SDCBP,VASP,RPS6KA4,ABI2,CAMKK2,PYCARD,ARHGEF10L
3_Member	GO Biological Processes	GO:0032970	regulation of actin filament-based process	-3.89398	-1.48868	10/404	683,822,998,5879,7408,10152,29108,55160,91663,203228	BST1,CAPG,CDC42,RAC1,VASP,ABI2,PYCARD,ARHGEF10L,MYADM,C9orf72
3_Member	GO Biological Processes	GO:1902905	positive regulation of supramolecular fiber organization	-3.63878	-1.33777	7/210	998,2876,5879,7408,10152,29108,55160	CDC42,GPX1,RAC1,VASP,ABI2,PYCARD,ARHGEF10L
3_Member	GO Biological Processes	GO:0051258	protein polymerization	-3.52581	-1.26361	8/290	822,3717,5879,7408,10152,29108,51734,91663	CAPG,JAK2,RAC1,VASP,ABI2,PYCARD,MSRB1,MYADM
3_Member	GO Biological Processes	GO:0051493	regulation of cytoskeleton organization	-2.8214	-0.831013	10/555	683,822,998,5879,7408,10152,29108,55160,91663,203228	BST1,CAPG,CDC42,RAC1,VASP,ABI2,PYCARD,ARHGEF10L,MYADM,C9orf72
3_Member	GO Biological Processes	GO:0032271	regulation of protein polymerization	-2.66279	-0.73638	6/228	822,5879,7408,10152,29108,91663	CAPG,RAC1,VASP,ABI2,PYCARD,MYADM
3_Member	GO Biological Processes	GO:0051495	positive regulation of cytoskeleton organization	-2.62511	-0.713064	6/232	998,5879,7408,10152,29108,55160	CDC42,RAC1,VASP,ABI2,PYCARD,ARHGEF10L
3_Member	GO Biological Processes	GO:0090066	regulation of anatomical structure size	-2.49952	-0.639809	9/515	822,2876,3162,3783,5879,7408,10152,29108,91663	CAPG,GPX1,HMOX1,KCNN4,RAC1,VASP,ABI2,PYCARD,MYADM
3_Member	GO Biological Processes	GO:0030833	regulation of actin filament polymerization	-2.48913	-0.633914	5/171	822,7408,10152,29108,91663	CAPG,VASP,ABI2,PYCARD,MYADM
3_Member	GO Biological Processes	GO:0008064	regulation of actin polymerization or depolymerization	-2.3245	-0.546976	5/187	822,7408,10152,29108,91663	CAPG,VASP,ABI2,PYCARD,MYADM
3_Member	GO Biological Processes	GO:0030832	regulation of actin filament length	-2.31478	-0.540983	5/188	822,7408,10152,29108,91663	CAPG,VASP,ABI2,PYCARD,MYADM
3_Member	GO Biological Processes	GO:0044089	positive regulation of cellular component biogenesis	-2.26892	-0.515663	9/559	822,998,2048,5879,6386,7408,10152,29108,55160	CAPG,CDC42,EPHB2,RAC1,SDCBP,VASP,ABI2,PYCARD,ARHGEF10L
3_Member	GO Biological Processes	GO:0032535	regulation of cellular component size	-2.17939	-0.456879	7/378	822,3783,5879,7408,10152,29108,91663	CAPG,KCNN4,RAC1,VASP,ABI2,PYCARD,MYADM
3_Member	GO Biological Processes	GO:0043254	regulation of protein complex assembly	-2.11338	-0.417524	8/488	822,998,5879,7408,8775,10152,29108,91663	CAPG,CDC42,RAC1,VASP,NAPA,ABI2,PYCARD,MYADM
3_Member	GO Biological Processes	GO:0032273	positive regulation of protein polymerization	-2.05511	-0.380013	4/139	5879,7408,10152,29108	RAC1,VASP,ABI2,PYCARD
4_Summary	GO Biological Processes	GO:0030335	positive regulation of cell migration	-6.02226	-2.9336	15/560	728,1230,1512,2896,3162,3717,4193,5606,5879,6386,8291,29108,54453,91663,286077,302,998,2048,2752,2876,4643,5315,8751,57178,64855	C5AR1,CCR1,CTSH,GRN,HMOX1,JAK2,MDM2,MAP2K3,RAC1,SDCBP,DYSF,PYCARD,RIN2,MYADM,FAM83H,ANXA2,CDC42,EPHB2,GLUL,GPX1,MYO1E,PKM,ADAM15,ZMIZ1,NIBAN2
4_Member	GO Biological Processes	GO:0030335	positive regulation of cell migration	-6.02226	-2.9336	15/560	728,1230,1512,2896,3162,3717,4193,5606,5879,6386,8291,29108,54453,91663,286077	C5AR1,CCR1,CTSH,GRN,HMOX1,JAK2,MDM2,MAP2K3,RAC1,SDCBP,DYSF,PYCARD,RIN2,MYADM,FAM83H
4_Member	GO Biological Processes	GO:2000147	positive regulation of cell motility	-5.79666	-2.75631	15/584	728,1230,1512,2896,3162,3717,4193,5606,5879,6386,8291,29108,54453,91663,286077	C5AR1,CCR1,CTSH,GRN,HMOX1,JAK2,MDM2,MAP2K3,RAC1,SDCBP,DYSF,PYCARD,RIN2,MYADM,FAM83H
4_Member	GO Biological Processes	GO:0051272	positive regulation of cellular component movement	-5.64375	-2.66707	15/601	728,1230,1512,2896,3162,3717,4193,5606,5879,6386,8291,29108,54453,91663,286077	C5AR1,CCR1,CTSH,GRN,HMOX1,JAK2,MDM2,MAP2K3,RAC1,SDCBP,DYSF,PYCARD,RIN2,MYADM,FAM83H
4_Member	GO Biological Processes	GO:0048514	blood vessel morphogenesis	-5.57823	-2.65993	16/690	302,728,998,1512,2048,2752,2876,2896,3162,4643,5315,8291,8751,54453,57178,64855	ANXA2,C5AR1,CDC42,CTSH,EPHB2,GLUL,GPX1,GRN,HMOX1,MYO1E,PKM,DYSF,ADAM15,RIN2,ZMIZ1,NIBAN2
4_Member	GO Biological Processes	GO:0001568	blood vessel development	-5.56039	-2.65993	17/777	302,728,998,1512,2048,2752,2876,2896,3162,4193,4643,5315,8291,8751,54453,57178,64855	ANXA2,C5AR1,CDC42,CTSH,EPHB2,GLUL,GPX1,GRN,HMOX1,MDM2,MYO1E,PKM,DYSF,ADAM15,RIN2,ZMIZ1,NIBAN2
4_Member	GO Biological Processes	GO:0040017	positive regulation of locomotion	-5.54767	-2.65993	15/612	728,1230,1512,2896,3162,3717,4193,5606,5879,6386,8291,29108,54453,91663,286077	C5AR1,CCR1,CTSH,GRN,HMOX1,JAK2,MDM2,MAP2K3,RAC1,SDCBP,DYSF,PYCARD,RIN2,MYADM,FAM83H
4_Member	GO Biological Processes	GO:0001525	angiogenesis	-4.35926	-1.76941	13/594	302,728,998,1512,2048,2752,2876,2896,3162,5315,8291,8751,64855	ANXA2,C5AR1,CDC42,CTSH,EPHB2,GLUL,GPX1,GRN,HMOX1,PKM,DYSF,ADAM15,NIBAN2
4_Member	GO Biological Processes	GO:0050679	positive regulation of epithelial cell proliferation	-2.8429	-0.838577	6/210	728,998,2752,2896,3162,8291	C5AR1,CDC42,GLUL,GRN,HMOX1,DYSF
4_Member	GO Biological Processes	GO:1904018	positive regulation of vasculature development	-2.61582	-0.708329	6/233	728,1512,2896,3162,5315,54453	C5AR1,CTSH,GRN,HMOX1,PKM,RIN2
4_Member	GO Biological Processes	GO:0010634	positive regulation of epithelial cell migration	-2.44629	-0.621334	5/175	1512,2896,3162,5606,54453	CTSH,GRN,HMOX1,MAP2K3,RIN2
4_Member	GO Biological Processes	GO:1901342	regulation of vasculature development	-2.41175	-0.599146	8/434	728,1512,2752,2896,3162,5315,54453,64855	C5AR1,CTSH,GLUL,GRN,HMOX1,PKM,RIN2,NIBAN2
4_Member	GO Biological Processes	GO:0010631	epithelial cell migration	-2.2984	-0.531996	7/359	1512,2752,2876,2896,3162,5606,54453	CTSH,GLUL,GPX1,GRN,HMOX1,MAP2K3,RIN2
4_Member	GO Biological Processes	GO:0090132	epithelium migration	-2.27906	-0.519863	7/362	1512,2752,2876,2896,3162,5606,54453	CTSH,GLUL,GPX1,GRN,HMOX1,MAP2K3,RIN2
4_Member	GO Biological Processes	GO:0090130	tissue migration	-2.24101	-0.498747	7/368	1512,2752,2876,2896,3162,5606,54453	CTSH,GLUL,GPX1,GRN,HMOX1,MAP2K3,RIN2
4_Member	GO Biological Processes	GO:0043542	endothelial cell migration	-2.22766	-0.492231	6/280	2752,2876,2896,3162,5606,54453	GLUL,GPX1,GRN,HMOX1,MAP2K3,RIN2
4_Member	GO Biological Processes	GO:0045766	positive regulation of angiogenesis	-2.14989	-0.438241	5/206	728,1512,2896,3162,5315	C5AR1,CTSH,GRN,HMOX1,PKM
4_Member	GO Biological Processes	GO:0010595	positive regulation of endothelial cell migration	-2.14391	-0.433326	4/131	2896,3162,5606,54453	GRN,HMOX1,MAP2K3,RIN2
4_Member	GO Biological Processes	GO:0010632	regulation of epithelial cell migration	-2.10713	-0.41436	6/297	1512,2752,2896,3162,5606,54453	CTSH,GLUL,GRN,HMOX1,MAP2K3,RIN2
4_Member	GO Biological Processes	GO:0045765	regulation of angiogenesis	-2.0967	-0.405982	7/392	728,1512,2752,2896,3162,5315,64855	C5AR1,CTSH,GLUL,GRN,HMOX1,PKM,NIBAN2
4_Member	GO Biological Processes	GO:0050678	regulation of epithelial cell proliferation	-2.0738	-0.393188	7/396	728,998,2752,2876,2896,3162,8291	C5AR1,CDC42,GLUL,GPX1,GRN,HMOX1,DYSF
5_Summary	GO Biological Processes	GO:0042116	macrophage activation	-5.8342	-2.77037	7/96	671,728,2896,3717,8291,22918,51311,3162,5606,91662	BPI,C5AR1,GRN,JAK2,DYSF,CD93,TLR8,HMOX1,MAP2K3,NLRP12
5_Member	GO Biological Processes	GO:0042116	macrophage activation	-5.8342	-2.77037	7/96	671,728,2896,3717,8291,22918,51311	BPI,C5AR1,GRN,JAK2,DYSF,CD93,TLR8
5_Member	GO Biological Processes	GO:0001774	microglial cell activation	-3.7281	-1.39126	4/49	728,2896,3717,51311	C5AR1,GRN,JAK2,TLR8
5_Member	GO Biological Processes	GO:0002269	leukocyte activation involved in inflammatory response	-3.7281	-1.39126	4/49	728,2896,3717,51311	C5AR1,GRN,JAK2,TLR8
5_Member	GO Biological Processes	GO:0061900	glial cell activation	-3.4155	-1.18794	4/59	728,2896,3717,51311	C5AR1,GRN,JAK2,TLR8
5_Member	GO Biological Processes	GO:0042035	regulation of cytokine biosynthetic process	-3.21732	-1.06938	5/117	3162,3717,5606,51311,91662	HMOX1,JAK2,MAP2K3,TLR8,NLRP12
5_Member	GO Biological Processes	GO:0042089	cytokine biosynthetic process	-3.0717	-0.975308	5/126	3162,3717,5606,51311,91662	HMOX1,JAK2,MAP2K3,TLR8,NLRP12
5_Member	GO Biological Processes	GO:0042107	cytokine metabolic process	-3.05626	-0.965036	5/127	3162,3717,5606,51311,91662	HMOX1,JAK2,MAP2K3,TLR8,NLRP12
5_Member	GO Biological Processes	GO:0150076	neuroinflammatory response	-2.99841	-0.932159	4/76	728,2896,3717,51311	C5AR1,GRN,JAK2,TLR8
5_Member	GO Biological Processes	GO:0042108	positive regulation of cytokine biosynthetic process	-2.12189	-0.422908	3/69	3162,3717,51311	HMOX1,JAK2,TLR8
6_Summary	GO Biological Processes	GO:0001817	regulation of cytokine production	-5.72788	-2.70981	17/755	671,728,2219,2597,2950,3162,3717,4602,5606,5879,8986,23646,29108,51311,55601,79671,91662,2752,3783,4923,6386,998,4193,11261,8775,51009,2876,2896,8291,153339,10783	BPI,C5AR1,FCN1,GAPDH,GSTP1,HMOX1,JAK2,MYB,MAP2K3,RAC1,RPS6KA4,PLD3,PYCARD,TLR8,DDX60,NLRX1,NLRP12,GLUL,KCNN4,NTSR1,SDCBP,CDC42,MDM2,CHP1,NAPA,DERL2,GPX1,GRN,DYSF,TMEM167A,NEK6
6_Member	GO Biological Processes	GO:0001817	regulation of cytokine production	-5.72788	-2.70981	17/755	671,728,2219,2597,2950,3162,3717,4602,5606,5879,8986,23646,29108,51311,55601,79671,91662	BPI,C5AR1,FCN1,GAPDH,GSTP1,HMOX1,JAK2,MYB,MAP2K3,RAC1,RPS6KA4,PLD3,PYCARD,TLR8,DDX60,NLRX1,NLRP12
6_Member	GO Biological Processes	GO:1903532	positive regulation of secretion by cell	-5.34191	-2.46996	12/406	2219,2597,2752,3717,3783,4602,4923,5879,6386,29108,51311,91662	FCN1,GAPDH,GLUL,JAK2,KCNN4,MYB,NTSR1,RAC1,SDCBP,PYCARD,TLR8,NLRP12
6_Member	GO Biological Processes	GO:0051222	positive regulation of protein transport	-5.13061	-2.28863	12/426	998,2219,2597,2752,3717,3783,4193,5879,11261,29108,51311,91662	CDC42,FCN1,GAPDH,GLUL,JAK2,KCNN4,MDM2,RAC1,CHP1,PYCARD,TLR8,NLRP12
6_Member	GO Biological Processes	GO:0051047	positive regulation of secretion	-5.02946	-2.21551	12/436	2219,2597,2752,3717,3783,4602,4923,5879,6386,29108,51311,91662	FCN1,GAPDH,GLUL,JAK2,KCNN4,MYB,NTSR1,RAC1,SDCBP,PYCARD,TLR8,NLRP12
6_Member	GO Biological Processes	GO:1904951	positive regulation of establishment of protein localization	-4.7608	-2.04376	12/464	998,2219,2597,2752,3717,3783,4193,5879,11261,29108,51311,91662	CDC42,FCN1,GAPDH,GLUL,JAK2,KCNN4,MDM2,RAC1,CHP1,PYCARD,TLR8,NLRP12
6_Member	GO Biological Processes	GO:0050714	positive regulation of protein secretion	-4.48521	-1.80956	9/274	2219,2597,2752,3717,3783,5879,29108,51311,91662	FCN1,GAPDH,GLUL,JAK2,KCNN4,RAC1,PYCARD,TLR8,NLRP12
6_Member	GO Biological Processes	GO:0002793	positive regulation of peptide secretion	-4.23683	-1.67435	9/295	2219,2597,2752,3717,3783,5879,29108,51311,91662	FCN1,GAPDH,GLUL,JAK2,KCNN4,RAC1,PYCARD,TLR8,NLRP12
6_Member	GO Biological Processes	GO:0001818	negative regulation of cytokine production	-4.06143	-1.58117	9/311	671,2950,3162,5879,8986,29108,51311,79671,91662	BPI,GSTP1,HMOX1,RAC1,RPS6KA4,PYCARD,TLR8,NLRX1,NLRP12
6_Member	GO Biological Processes	GO:0001819	positive regulation of cytokine production	-4.04225	-1.5744	11/467	728,2219,2597,3162,3717,4602,29108,51311,55601,79671,91662	C5AR1,FCN1,GAPDH,HMOX1,JAK2,MYB,PYCARD,TLR8,DDX60,NLRX1,NLRP12
6_Member	GO Biological Processes	GO:1903530	regulation of secretion by cell	-3.75842	-1.4078	14/777	2219,2597,2752,3162,3717,3783,4602,4923,5879,6386,8775,29108,51311,91662	FCN1,GAPDH,GLUL,HMOX1,JAK2,KCNN4,MYB,NTSR1,RAC1,SDCBP,NAPA,PYCARD,TLR8,NLRP12
6_Member	GO Biological Processes	GO:0043124	negative regulation of I-kappaB kinase/NF-kappaB signaling	-3.62749	-1.33777	4/52	2950,29108,79671,91662	GSTP1,PYCARD,NLRX1,NLRP12
6_Member	GO Biological Processes	GO:0032651	regulation of interleukin-1 beta production	-3.61312	-1.32744	5/96	2950,3717,29108,51311,91662	GSTP1,JAK2,PYCARD,TLR8,NLRP12
6_Member	GO Biological Processes	GO:0032731	positive regulation of interleukin-1 beta production	-3.59536	-1.31764	4/53	3717,29108,51311,91662	JAK2,PYCARD,TLR8,NLRP12
6_Member	GO Biological Processes	GO:0051223	regulation of protein transport	-3.50343	-1.25251	13/725	998,2219,2597,2752,3717,3783,4193,5879,11261,29108,51009,51311,91662	CDC42,FCN1,GAPDH,GLUL,JAK2,KCNN4,MDM2,RAC1,CHP1,PYCARD,DERL2,TLR8,NLRP12
6_Member	GO Biological Processes	GO:0032611	interleukin-1 beta production	-3.41362	-1.18794	5/106	2950,3717,29108,51311,91662	GSTP1,JAK2,PYCARD,TLR8,NLRP12
6_Member	GO Biological Processes	GO:0032732	positive regulation of interleukin-1 production	-3.38748	-1.17559	4/60	3717,29108,51311,91662	JAK2,PYCARD,TLR8,NLRP12
6_Member	GO Biological Processes	GO:0032652	regulation of interleukin-1 production	-3.35788	-1.14936	5/109	2950,3717,29108,51311,91662	GSTP1,JAK2,PYCARD,TLR8,NLRP12
6_Member	GO Biological Processes	GO:0090087	regulation of peptide transport	-3.3367	-1.13816	13/755	998,2219,2597,2752,3717,3783,4193,5879,11261,29108,51009,51311,91662	CDC42,FCN1,GAPDH,GLUL,JAK2,KCNN4,MDM2,RAC1,CHP1,PYCARD,DERL2,TLR8,NLRP12
6_Member	GO Biological Processes	GO:0070201	regulation of establishment of protein localization	-3.24628	-1.09152	13/772	998,2219,2597,2752,3717,3783,4193,5879,11261,29108,51009,51311,91662	CDC42,FCN1,GAPDH,GLUL,JAK2,KCNN4,MDM2,RAC1,CHP1,PYCARD,DERL2,TLR8,NLRP12
6_Member	GO Biological Processes	GO:0050728	negative regulation of inflammatory response	-3.18861	-1.05702	6/180	2876,2896,2950,29108,79671,91662	GPX1,GRN,GSTP1,PYCARD,NLRX1,NLRP12
6_Member	GO Biological Processes	GO:0032612	interleukin-1 production	-3.1674	-1.04305	5/120	2950,3717,29108,51311,91662	GSTP1,JAK2,PYCARD,TLR8,NLRP12
6_Member	GO Biological Processes	GO:0009306	protein secretion	-3.03512	-0.954063	11/614	2219,2597,2752,3717,3783,5879,8291,29108,51311,91662,153339	FCN1,GAPDH,GLUL,JAK2,KCNN4,RAC1,DYSF,PYCARD,TLR8,NLRP12,TMEM167A
6_Member	GO Biological Processes	GO:0050718	positive regulation of interleukin-1 beta secretion	-3.00018	-0.932159	3/34	29108,51311,91662	PYCARD,TLR8,NLRP12
6_Member	GO Biological Processes	GO:0032677	regulation of interleukin-8 production	-2.95626	-0.903476	4/78	671,2219,29108,51311	BPI,FCN1,PYCARD,TLR8
6_Member	GO Biological Processes	GO:0007249	I-kappaB kinase/NF-kappaB signaling	-2.90719	-0.880336	7/279	2950,3162,10783,29108,51311,79671,91662	GSTP1,HMOX1,NEK6,PYCARD,TLR8,NLRX1,NLRP12
6_Member	GO Biological Processes	GO:0002790	peptide secretion	-2.84249	-0.838577	11/649	2219,2597,2752,3717,3783,5879,8291,29108,51311,91662,153339	FCN1,GAPDH,GLUL,JAK2,KCNN4,RAC1,DYSF,PYCARD,TLR8,NLRP12,TMEM167A
6_Member	GO Biological Processes	GO:0050715	positive regulation of cytokine secretion	-2.84013	-0.838577	5/142	2219,2597,29108,51311,91662	FCN1,GAPDH,PYCARD,TLR8,NLRP12
6_Member	GO Biological Processes	GO:0050716	positive regulation of interleukin-1 secretion	-2.82546	-0.831013	3/39	29108,51311,91662	PYCARD,TLR8,NLRP12
6_Member	GO Biological Processes	GO:0032637	interleukin-8 production	-2.79893	-0.818281	4/86	671,2219,29108,51311	BPI,FCN1,PYCARD,TLR8
6_Member	GO Biological Processes	GO:0050708	regulation of protein secretion	-2.63125	-0.716973	9/492	2219,2597,2752,3717,3783,5879,29108,51311,91662	FCN1,GAPDH,GLUL,JAK2,KCNN4,RAC1,PYCARD,TLR8,NLRP12
6_Member	GO Biological Processes	GO:0032675	regulation of interleukin-6 production	-2.61338	-0.70757	5/160	671,29108,51311,79671,91662	BPI,PYCARD,TLR8,NLRX1,NLRP12
6_Member	GO Biological Processes	GO:0032648	regulation of interferon-beta production	-2.51425	-0.645211	3/50	29108,51311,79671	PYCARD,TLR8,NLRX1
6_Member	GO Biological Processes	GO:0050706	regulation of interleukin-1 beta secretion	-2.51425	-0.645211	3/50	29108,51311,91662	PYCARD,TLR8,NLRP12
6_Member	GO Biological Processes	GO:0043122	regulation of I-kappaB kinase/NF-kappaB signaling	-2.50797	-0.643705	6/245	2950,3162,10783,29108,79671,91662	GSTP1,HMOX1,NEK6,PYCARD,NLRX1,NLRP12
6_Member	GO Biological Processes	GO:0032635	interleukin-6 production	-2.50002	-0.639809	5/170	671,29108,51311,79671,91662	BPI,PYCARD,TLR8,NLRX1,NLRP12
6_Member	GO Biological Processes	GO:0002791	regulation of peptide secretion	-2.47195	-0.628106	9/520	2219,2597,2752,3717,3783,5879,29108,51311,91662	FCN1,GAPDH,GLUL,JAK2,KCNN4,RAC1,PYCARD,TLR8,NLRP12
6_Member	GO Biological Processes	GO:0032608	interferon-beta production	-2.46577	-0.628106	3/52	29108,51311,79671	PYCARD,TLR8,NLRX1
6_Member	GO Biological Processes	GO:0032757	positive regulation of interleukin-8 production	-2.46577	-0.628106	3/52	2219,29108,51311	FCN1,PYCARD,TLR8
6_Member	GO Biological Processes	GO:0031348	negative regulation of defense response	-2.44803	-0.621334	6/252	2876,2896,2950,29108,79671,91662	GPX1,GRN,GSTP1,PYCARD,NLRX1,NLRP12
6_Member	GO Biological Processes	GO:0050663	cytokine secretion	-2.42298	-0.606299	6/255	2219,2597,8291,29108,51311,91662	FCN1,GAPDH,DYSF,PYCARD,TLR8,NLRP12
6_Member	GO Biological Processes	GO:0050702	interleukin-1 beta secretion	-2.37468	-0.578016	3/56	29108,51311,91662	PYCARD,TLR8,NLRP12
6_Member	GO Biological Processes	GO:0050704	regulation of interleukin-1 secretion	-2.35302	-0.564116	3/57	29108,51311,91662	PYCARD,TLR8,NLRP12
6_Member	GO Biological Processes	GO:0050701	interleukin-1 secretion	-2.2123	-0.482684	3/64	29108,51311,91662	PYCARD,TLR8,NLRP12
7_Summary	GO Biological Processes	GO:0034599	cellular response to oxidative stress	-5.70521	-2.70833	11/309	847,2876,2950,3162,3717,4193,4602,5164,10645,133522,140809,728,2896,5315,8291,8751,3417,2752,5292,5879,7071,51311,1512,2023,29108,85450,5106,5714,2769,7357,57178	CAT,GPX1,GSTP1,HMOX1,JAK2,MDM2,MYB,PDK2,CAMKK2,PPARGC1B,SRXN1,C5AR1,GRN,PKM,DYSF,ADAM15,IDH1,GLUL,PIM1,RAC1,KLF10,TLR8,CTSH,ENO1,PYCARD,ITPRIP,PCK2,PSMD8,GNA15,UGCG,ZMIZ1
7_Member	GO Biological Processes	GO:0034599	cellular response to oxidative stress	-5.70521	-2.70833	11/309	847,2876,2950,3162,3717,4193,4602,5164,10645,133522,140809	CAT,GPX1,GSTP1,HMOX1,JAK2,MDM2,MYB,PDK2,CAMKK2,PPARGC1B,SRXN1
7_Member	GO Biological Processes	GO:0031099	regeneration	-5.59854	-2.65993	9/199	728,2876,2896,2950,3162,3717,5315,8291,8751	C5AR1,GPX1,GRN,GSTP1,HMOX1,JAK2,PKM,DYSF,ADAM15
7_Member	GO Biological Processes	GO:0000302	response to reactive oxygen species	-4.99773	-2.19714	9/236	847,2876,2950,3162,4193,4602,5164,10645,133522	CAT,GPX1,GSTP1,HMOX1,MDM2,MYB,PDK2,CAMKK2,PPARGC1B
7_Member	GO Biological Processes	GO:0006979	response to oxidative stress	-4.81665	-2.06575	12/458	847,2876,2950,3162,3417,3717,4193,4602,5164,10645,133522,140809	CAT,GPX1,GSTP1,HMOX1,IDH1,JAK2,MDM2,MYB,PDK2,CAMKK2,PPARGC1B,SRXN1
7_Member	GO Biological Processes	GO:0071496	cellular response to external stimulus	-3.80823	-1.43361	9/336	2752,2950,3162,4193,5164,5292,5879,7071,51311	GLUL,GSTP1,HMOX1,MDM2,PDK2,PIM1,RAC1,KLF10,TLR8
7_Member	GO Biological Processes	GO:0007584	response to nutrient	-3.52807	-1.26361	7/219	847,2950,3162,4193,5164,5292,5315	CAT,GSTP1,HMOX1,MDM2,PDK2,PIM1,PKM
7_Member	GO Biological Processes	GO:2001233	regulation of apoptotic signaling pathway	-3.19289	-1.05847	9/408	1512,2023,2876,2950,3162,3717,4193,29108,85450	CTSH,ENO1,GPX1,GSTP1,HMOX1,JAK2,MDM2,PYCARD,ITPRIP
7_Member	GO Biological Processes	GO:0031667	response to nutrient levels	-3.15553	-1.03782	10/501	847,2752,2950,3162,4193,5106,5164,5292,5315,7071	CAT,GLUL,GSTP1,HMOX1,MDM2,PCK2,PDK2,PIM1,PKM,KLF10
7_Member	GO Biological Processes	GO:0031100	animal organ regeneration	-3.04182	-0.955709	4/74	728,2950,3162,5315	C5AR1,GSTP1,HMOX1,PKM
7_Member	GO Biological Processes	GO:0031670	cellular response to nutrient	-3.04182	-0.955709	4/74	3162,4193,5164,5292	HMOX1,MDM2,PDK2,PIM1
7_Member	GO Biological Processes	GO:0031668	cellular response to extracellular stimulus	-3.03648	-0.954063	7/265	2752,2950,3162,4193,5164,5292,7071	GLUL,GSTP1,HMOX1,MDM2,PDK2,PIM1,KLF10
7_Member	GO Biological Processes	GO:0009991	response to extracellular stimulus	-2.9459	-0.900951	10/534	847,2752,2950,3162,4193,5106,5164,5292,5315,7071	CAT,GLUL,GSTP1,HMOX1,MDM2,PCK2,PDK2,PIM1,PKM,KLF10
7_Member	GO Biological Processes	GO:0001666	response to hypoxia	-2.92814	-0.898079	8/358	847,2023,3162,4193,4602,5315,5714,8751	CAT,ENO1,HMOX1,MDM2,MYB,PKM,PSMD8,ADAM15
7_Member	GO Biological Processes	GO:0036293	response to decreased oxygen levels	-2.83754	-0.838577	8/370	847,2023,3162,4193,4602,5315,5714,8751	CAT,ENO1,HMOX1,MDM2,MYB,PKM,PSMD8,ADAM15
7_Member	GO Biological Processes	GO:0097193	intrinsic apoptotic signaling pathway	-2.81966	-0.831013	7/289	2023,2876,3162,3717,4193,5164,29108	ENO1,GPX1,HMOX1,JAK2,MDM2,PDK2,PYCARD
7_Member	GO Biological Processes	GO:1904705	regulation of vascular smooth muscle cell proliferation	-2.81768	-0.831013	4/85	2950,3162,3717,4193	GSTP1,HMOX1,JAK2,MDM2
7_Member	GO Biological Processes	GO:1990874	vascular smooth muscle cell proliferation	-2.81768	-0.831013	4/85	2950,3162,3717,4193	GSTP1,HMOX1,JAK2,MDM2
7_Member	GO Biological Processes	GO:0042542	response to hydrogen peroxide	-2.78694	-0.814185	5/146	847,2876,3162,4193,4602	CAT,GPX1,HMOX1,MDM2,MYB
7_Member	GO Biological Processes	GO:1902042	negative regulation of extrinsic apoptotic signaling pathway via death domain receptors	-2.76227	-0.797268	3/41	2876,3162,85450	GPX1,HMOX1,ITPRIP
7_Member	GO Biological Processes	GO:0097191	extrinsic apoptotic signaling pathway	-2.70129	-0.764196	6/224	2876,2950,3162,3717,29108,85450	GPX1,GSTP1,HMOX1,JAK2,PYCARD,ITPRIP
7_Member	GO Biological Processes	GO:0070482	response to oxygen levels	-2.66724	-0.739067	8/394	847,2023,3162,4193,4602,5315,5714,8751	CAT,ENO1,HMOX1,MDM2,MYB,PKM,PSMD8,ADAM15
7_Member	GO Biological Processes	GO:2001236	regulation of extrinsic apoptotic signaling pathway	-2.64903	-0.72786	5/157	2876,2950,3162,29108,85450	GPX1,GSTP1,HMOX1,PYCARD,ITPRIP
7_Member	GO Biological Processes	GO:2001234	negative regulation of apoptotic signaling pathway	-2.61582	-0.708329	6/233	2023,2876,2950,3162,4193,85450	ENO1,GPX1,GSTP1,HMOX1,MDM2,ITPRIP
7_Member	GO Biological Processes	GO:0031669	cellular response to nutrient levels	-2.60657	-0.704103	6/234	2752,3162,4193,5164,5292,7071	GLUL,HMOX1,MDM2,PDK2,PIM1,KLF10
7_Member	GO Biological Processes	GO:0033002	muscle cell proliferation	-2.55209	-0.665956	6/240	2950,3162,3717,4193,4602,5292	GSTP1,HMOX1,JAK2,MDM2,MYB,PIM1
7_Member	GO Biological Processes	GO:0048661	positive regulation of smooth muscle cell proliferation	-2.54401	-0.661063	4/101	3162,3717,4193,4602	HMOX1,JAK2,MDM2,MYB
7_Member	GO Biological Processes	GO:0097190	apoptotic signaling pathway	-2.53925	-0.661057	10/607	1512,2023,2876,2950,3162,3717,4193,5164,29108,85450	CTSH,ENO1,GPX1,GSTP1,HMOX1,JAK2,MDM2,PDK2,PYCARD,ITPRIP
7_Member	GO Biological Processes	GO:0032870	cellular response to hormone stimulus	-2.53027	-0.653643	11/712	1512,2769,2950,3717,4193,5106,5164,5315,7357,57178,133522	CTSH,GNA15,GSTP1,JAK2,MDM2,PCK2,PDK2,PKM,UGCG,ZMIZ1,PPARGC1B
7_Member	GO Biological Processes	GO:0048660	regulation of smooth muscle cell proliferation	-2.511	-0.645211	5/169	2950,3162,3717,4193,4602	GSTP1,HMOX1,JAK2,MDM2,MYB
7_Member	GO Biological Processes	GO:0046677	response to antibiotic	-2.48979	-0.633914	7/331	847,2876,2950,3162,3717,4193,4602	CAT,GPX1,GSTP1,HMOX1,JAK2,MDM2,MYB
7_Member	GO Biological Processes	GO:0048659	smooth muscle cell proliferation	-2.48913	-0.633914	5/171	2950,3162,3717,4193,4602	GSTP1,HMOX1,JAK2,MDM2,MYB
7_Member	GO Biological Processes	GO:2001237	negative regulation of extrinsic apoptotic signaling pathway	-2.46847	-0.628106	4/106	2876,2950,3162,85450	GPX1,GSTP1,HMOX1,ITPRIP
7_Member	GO Biological Processes	GO:1902041	regulation of extrinsic apoptotic signaling pathway via death domain receptors	-2.29049	-0.529395	3/60	2876,3162,85450	GPX1,HMOX1,ITPRIP
7_Member	GO Biological Processes	GO:0048545	response to steroid hormone	-2.13164	-0.42532	7/386	2950,3417,3717,4193,5106,57178,133522	GSTP1,IDH1,JAK2,MDM2,PCK2,ZMIZ1,PPARGC1B
7_Member	GO Biological Processes	GO:1901653	cellular response to peptide	-2.06813	-0.389505	7/397	2950,3717,4193,5106,5164,5315,7071	GSTP1,JAK2,MDM2,PCK2,PDK2,PKM,KLF10
8_Summary	GO Biological Processes	GO:0031589	cell-substrate adhesion	-5.15318	-2.29647	11/353	683,967,998,3717,4811,5879,6614,7791,8751,54453,91663,4602,8291,29108,57178,671,2896,3162,5359,1089,2219,22918	BST1,CD63,CDC42,JAK2,NID1,RAC1,SIGLEC1,ZYX,ADAM15,RIN2,MYADM,MYB,DYSF,PYCARD,ZMIZ1,BPI,GRN,HMOX1,PLSCR1,CEACAM4,FCN1,CD93
8_Member	GO Biological Processes	GO:0031589	cell-substrate adhesion	-5.15318	-2.29647	11/353	683,967,998,3717,4811,5879,6614,7791,8751,54453,91663	BST1,CD63,CDC42,JAK2,NID1,RAC1,SIGLEC1,ZYX,ADAM15,RIN2,MYADM
8_Member	GO Biological Processes	GO:0010810	regulation of cell-substrate adhesion	-4.42298	-1.78512	8/215	683,998,3717,4811,5879,8751,54453,91663	BST1,CDC42,JAK2,NID1,RAC1,ADAM15,RIN2,MYADM
8_Member	GO Biological Processes	GO:0007160	cell-matrix adhesion	-4.22969	-1.67435	8/229	683,967,4811,5879,6614,7791,8751,54453	BST1,CD63,NID1,RAC1,SIGLEC1,ZYX,ADAM15,RIN2
8_Member	GO Biological Processes	GO:0010811	positive regulation of cell-substrate adhesion	-4.14077	-1.62101	6/120	998,3717,4811,5879,54453,91663	CDC42,JAK2,NID1,RAC1,RIN2,MYADM
8_Member	GO Biological Processes	GO:0045785	positive regulation of cell adhesion	-3.7909	-1.42604	10/416	998,3717,4602,4811,5879,8291,29108,54453,57178,91663	CDC42,JAK2,MYB,NID1,RAC1,DYSF,PYCARD,RIN2,ZMIZ1,MYADM
8_Member	GO Biological Processes	GO:0007229	integrin-mediated signaling pathway	-3.39485	-1.17954	5/107	683,967,998,7791,8751	BST1,CD63,CDC42,ZYX,ADAM15
8_Member	GO Biological Processes	GO:0030155	regulation of cell adhesion	-3.01541	-0.939342	12/716	683,998,3717,4602,4811,5879,8291,8751,29108,54453,57178,91663	BST1,CDC42,JAK2,MYB,NID1,RAC1,DYSF,ADAM15,PYCARD,RIN2,ZMIZ1,MYADM
8_Member	GO Biological Processes	GO:0050865	regulation of cell activation	-2.9342	-0.898079	11/632	671,683,998,2896,3162,3717,4602,5359,5879,29108,57178	BPI,BST1,CDC42,GRN,HMOX1,JAK2,MYB,PLSCR1,RAC1,PYCARD,ZMIZ1
8_Member	GO Biological Processes	GO:0002694	regulation of leukocyte activation	-2.6383	-0.721068	10/588	671,683,998,2896,3162,4602,5359,5879,29108,57178	BPI,BST1,CDC42,GRN,HMOX1,MYB,PLSCR1,RAC1,PYCARD,ZMIZ1
8_Member	GO Biological Processes	GO:0001952	regulation of cell-matrix adhesion	-2.23932	-0.498747	4/123	683,5879,8751,54453	BST1,RAC1,ADAM15,RIN2
8_Member	GO Biological Processes	GO:0006909	phagocytosis	-2.2161	-0.483577	7/372	998,1089,2219,5879,8291,22918,29108	CDC42,CEACAM4,FCN1,RAC1,DYSF,CD93,PYCARD
8_Member	GO Biological Processes	GO:0050870	positive regulation of T cell activation	-2.14989	-0.438241	5/206	998,4602,5879,29108,57178	CDC42,MYB,RAC1,PYCARD,ZMIZ1
8_Member	GO Biological Processes	GO:0050867	positive regulation of cell activation	-2.01792	-0.355539	7/406	683,998,3717,4602,5879,29108,57178	BST1,CDC42,JAK2,MYB,RAC1,PYCARD,ZMIZ1
9_Summary	GO Biological Processes	GO:0050727	regulation of inflammatory response	-5.06839	-2.24064	13/508	683,728,2876,2896,2950,3717,5199,7791,11274,23646,29108,79671,91662,671,4064,4602,5106,5292,8751,57178,133522,5714,84888,1439,5836	BST1,C5AR1,GPX1,GRN,GSTP1,JAK2,CFP,ZYX,USP18,PLD3,PYCARD,NLRX1,NLRP12,BPI,CD180,MYB,PCK2,PIM1,ADAM15,ZMIZ1,PPARGC1B,PSMD8,SPPL2A,CSF2RB,PYGL
9_Member	GO Biological Processes	GO:0050727	regulation of inflammatory response	-5.06839	-2.24064	13/508	683,728,2876,2896,2950,3717,5199,7791,11274,23646,29108,79671,91662	BST1,C5AR1,GPX1,GRN,GSTP1,JAK2,CFP,ZYX,USP18,PLD3,PYCARD,NLRX1,NLRP12
9_Member	GO Biological Processes	GO:0071396	cellular response to lipid	-3.02371	-0.945151	11/616	671,2950,3717,4064,4602,5106,5292,8751,29108,57178,133522	BPI,GSTP1,JAK2,CD180,MYB,PCK2,PIM1,ADAM15,PYCARD,ZMIZ1,PPARGC1B
9_Member	GO Biological Processes	GO:0033209	tumor necrosis factor-mediated signaling pathway	-2.511	-0.645211	5/169	2950,3717,5714,29108,84888	GSTP1,JAK2,PSMD8,PYCARD,SPPL2A
9_Member	GO Biological Processes	GO:0009617	response to bacterium	-2.45279	-0.623643	11/729	671,728,1439,2876,2896,2950,3717,4064,5199,5836,29108	BPI,C5AR1,CSF2RB,GPX1,GRN,GSTP1,JAK2,CD180,CFP,PYGL,PYCARD
9_Member	GO Biological Processes	GO:0001959	regulation of cytokine-mediated signaling pathway	-2.44629	-0.621334	5/175	2950,3717,11274,29108,84888	GSTP1,JAK2,USP18,PYCARD,SPPL2A
9_Member	GO Biological Processes	GO:0032496	response to lipopolysaccharide	-2.44001	-0.618589	7/338	671,728,1439,2950,3717,4064,29108	BPI,C5AR1,CSF2RB,GSTP1,JAK2,CD180,PYCARD
9_Member	GO Biological Processes	GO:0060759	regulation of response to cytokine stimulus	-2.31478	-0.540983	5/188	2950,3717,11274,29108,84888	GSTP1,JAK2,USP18,PYCARD,SPPL2A
9_Member	GO Biological Processes	GO:0002237	response to molecule of bacterial origin	-2.3049	-0.535062	7/358	671,728,1439,2950,3717,4064,29108	BPI,C5AR1,CSF2RB,GSTP1,JAK2,CD180,PYCARD
9_Member	GO Biological Processes	GO:0010803	regulation of tumor necrosis factor-mediated signaling pathway	-2.29049	-0.529395	3/60	2950,29108,84888	GSTP1,PYCARD,SPPL2A
10_Summary	GO Biological Processes	GO:0051345	positive regulation of hydrolase activity	-4.93	-2.14237	16/777	483,728,1512,2769,2896,3717,5359,8775,23786,26000,29108,54453,55160,55357,91662,133522,2876,4193,27074,334,2597,2023,90637,1368,5199	ATP1B3,C5AR1,CTSH,GNA15,GRN,JAK2,PLSCR1,NAPA,BCL2L13,TBC1D10B,PYCARD,RIN2,ARHGEF10L,TBC1D2,NLRP12,PPARGC1B,GPX1,MDM2,LAMP3,APLP2,GAPDH,ENO1,ZFAND2A,CPM,CFP
10_Member	GO Biological Processes	GO:0051345	positive regulation of hydrolase activity	-4.93	-2.14237	16/777	483,728,1512,2769,2896,3717,5359,8775,23786,26000,29108,54453,55160,55357,91662,133522	ATP1B3,C5AR1,CTSH,GNA15,GRN,JAK2,PLSCR1,NAPA,BCL2L13,TBC1D10B,PYCARD,RIN2,ARHGEF10L,TBC1D2,NLRP12,PPARGC1B
10_Member	GO Biological Processes	GO:0043281	regulation of cysteine-type endopeptidase activity involved in apoptotic process	-4.42298	-1.78512	8/215	1512,2876,3717,4193,23786,27074,29108,91662	CTSH,GPX1,JAK2,MDM2,BCL2L13,LAMP3,PYCARD,NLRP12
10_Member	GO Biological Processes	GO:0052547	regulation of peptidase activity	-4.10028	-1.6069	11/460	334,1512,2597,2876,2896,3717,4193,23786,27074,29108,91662	APLP2,CTSH,GAPDH,GPX1,GRN,JAK2,MDM2,BCL2L13,LAMP3,PYCARD,NLRP12
10_Member	GO Biological Processes	GO:2000116	regulation of cysteine-type endopeptidase activity	-4.09993	-1.6069	8/239	1512,2876,3717,4193,23786,27074,29108,91662	CTSH,GPX1,JAK2,MDM2,BCL2L13,LAMP3,PYCARD,NLRP12
10_Member	GO Biological Processes	GO:0006919	activation of cysteine-type endopeptidase activity involved in apoptotic process	-3.76714	-1.40792	5/89	1512,3717,23786,29108,91662	CTSH,JAK2,BCL2L13,PYCARD,NLRP12
10_Member	GO Biological Processes	GO:0052548	regulation of endopeptidase activity	-3.68339	-1.36429	10/429	334,1512,2597,2876,3717,4193,23786,27074,29108,91662	APLP2,CTSH,GAPDH,GPX1,JAK2,MDM2,BCL2L13,LAMP3,PYCARD,NLRP12
10_Member	GO Biological Processes	GO:0045862	positive regulation of proteolysis	-3.49889	-1.25166	9/370	1512,2023,2896,3717,4193,23786,29108,90637,91662	CTSH,ENO1,GRN,JAK2,MDM2,BCL2L13,PYCARD,ZFAND2A,NLRP12
10_Member	GO Biological Processes	GO:0043280	positive regulation of cysteine-type endopeptidase activity involved in apoptotic process	-2.95192	-0.903476	5/134	1512,3717,23786,29108,91662	CTSH,JAK2,BCL2L13,PYCARD,NLRP12
10_Member	GO Biological Processes	GO:0010952	positive regulation of peptidase activity	-2.95122	-0.903476	6/200	1512,2896,3717,23786,29108,91662	CTSH,GRN,JAK2,BCL2L13,PYCARD,NLRP12
10_Member	GO Biological Processes	GO:2001056	positive regulation of cysteine-type endopeptidase activity	-2.72279	-0.774754	5/151	1512,3717,23786,29108,91662	CTSH,JAK2,BCL2L13,PYCARD,NLRP12
10_Member	GO Biological Processes	GO:0016485	protein processing	-2.51884	-0.645211	7/327	728,1368,1512,2023,4193,5199,29108	C5AR1,CPM,CTSH,ENO1,MDM2,CFP,PYCARD
10_Member	GO Biological Processes	GO:0031638	zymogen activation	-2.4193	-0.605339	3/54	1512,2023,29108	CTSH,ENO1,PYCARD
10_Member	GO Biological Processes	GO:0010950	positive regulation of endopeptidase activity	-2.39436	-0.589798	5/180	1512,3717,23786,29108,91662	CTSH,JAK2,BCL2L13,PYCARD,NLRP12
10_Member	GO Biological Processes	GO:0051604	protein maturation	-2.0738	-0.393188	7/396	728,1368,1512,2023,4193,5199,29108	C5AR1,CPM,CTSH,ENO1,MDM2,CFP,PYCARD
11_Summary	GO Biological Processes	GO:0097237	cellular response to toxic substance	-4.78458	-2.04526	9/251	847,2876,2950,3162,4193,4602,5292,125336,140809,217,5106,80896,3417,5879,1512,5606,683,3717,2752	CAT,GPX1,GSTP1,HMOX1,MDM2,MYB,PIM1,LOXHD1,SRXN1,ALDH2,PCK2,NPL,IDH1,RAC1,CTSH,MAP2K3,BST1,JAK2,GLUL
11_Member	GO Biological Processes	GO:0097237	cellular response to toxic substance	-4.78458	-2.04526	9/251	847,2876,2950,3162,4193,4602,5292,125336,140809	CAT,GPX1,GSTP1,HMOX1,MDM2,MYB,PIM1,LOXHD1,SRXN1
11_Member	GO Biological Processes	GO:0017001	antibiotic catabolic process	-4.58957	-1.89372	5/60	217,847,2876,5106,80896	ALDH2,CAT,GPX1,PCK2,NPL
11_Member	GO Biological Processes	GO:0016999	antibiotic metabolic process	-4.51772	-1.83208	7/152	217,847,2876,3417,5106,5879,80896	ALDH2,CAT,GPX1,IDH1,PCK2,RAC1,NPL
11_Member	GO Biological Processes	GO:1990748	cellular detoxification	-4.26506	-1.69414	6/114	847,2876,2950,5292,125336,140809	CAT,GPX1,GSTP1,PIM1,LOXHD1,SRXN1
11_Member	GO Biological Processes	GO:0098754	detoxification	-3.89398	-1.48868	6/133	847,2876,2950,5292,125336,140809	CAT,GPX1,GSTP1,PIM1,LOXHD1,SRXN1
11_Member	GO Biological Processes	GO:0042737	drug catabolic process	-3.68933	-1.36585	6/145	217,847,1512,2876,5106,80896	ALDH2,CAT,CTSH,GPX1,PCK2,NPL
11_Member	KEGG Pathway	hsa05014	amyotrophic lateral sclerosis (ALS)	-3.66031	-1.35147	4/51	847,2876,5606,5879	CAT,GPX1,MAP2K3,RAC1
11_Member	GO Biological Processes	GO:0098869	cellular oxidant detoxification	-3.47118	-1.23301	5/103	847,2876,2950,125336,140809	CAT,GPX1,GSTP1,LOXHD1,SRXN1
11_Member	Reactome Gene Sets	R-HSA-3299685	detoxification of Reactive Oxygen Species	-2.89226	-0.869822	3/37	847,2876,2950	CAT,GPX1,GSTP1
11_Member	GO Biological Processes	GO:0033273	response to vitamin	-2.70872	-0.76801	4/91	847,2950,4193,5292	CAT,GSTP1,MDM2,PIM1
11_Member	KEGG Pathway	hsa00480	glutathione metabolism	-2.4193	-0.605339	3/54	2876,2950,3417	GPX1,GSTP1,IDH1
11_Member	GO Biological Processes	GO:0009636	response to toxic substance	-2.40197	-0.592064	9/533	847,2876,2950,3162,4193,4602,5292,125336,140809	CAT,GPX1,GSTP1,HMOX1,MDM2,MYB,PIM1,LOXHD1,SRXN1
11_Member	GO Biological Processes	GO:0006749	glutathione metabolic process	-2.37468	-0.578016	3/56	2876,2950,3417	GPX1,GSTP1,IDH1
11_Member	GO Biological Processes	GO:0042743	hydrogen peroxide metabolic process	-2.33178	-0.551752	3/58	847,2876,5879	CAT,GPX1,RAC1
11_Member	GO Biological Processes	GO:0072593	reactive oxygen species metabolic process	-2.18407	-0.460456	6/286	683,847,2876,2950,3717,5879	BST1,CAT,GPX1,GSTP1,JAK2,RAC1
11_Member	GO Biological Processes	GO:0034284	response to monosaccharide	-2.15858	-0.443702	5/205	847,2752,2950,5106,5879	CAT,GLUL,GSTP1,PCK2,RAC1
11_Member	GO Biological Processes	GO:0051187	cofactor catabolic process	-2.13937	-0.430926	3/68	847,2876,3162	CAT,GPX1,HMOX1
12_Summary	GO Biological Processes	GO:0030316	osteoclast differentiation	-4.6359	-1.92957	6/98	302,1230,7071,9935,10766,133522,998,4602,57178,5292,5714,3717	ANXA2,CCR1,KLF10,MAFB,TOB2,PPARGC1B,CDC42,MYB,ZMIZ1,PIM1,PSMD8,JAK2
12_Member	GO Biological Processes	GO:0030316	osteoclast differentiation	-4.6359	-1.92957	6/98	302,1230,7071,9935,10766,133522	ANXA2,CCR1,KLF10,MAFB,TOB2,PPARGC1B
12_Member	GO Biological Processes	GO:0045670	regulation of osteoclast differentiation	-4.38779	-1.78469	5/66	1230,7071,9935,10766,133522	CCR1,KLF10,MAFB,TOB2,PPARGC1B
12_Member	GO Biological Processes	GO:0002573	myeloid leukocyte differentiation	-3.66414	-1.35147	7/208	302,998,1230,7071,9935,10766,133522	ANXA2,CDC42,CCR1,KLF10,MAFB,TOB2,PPARGC1B
12_Member	GO Biological Processes	GO:0045672	positive regulation of osteoclast differentiation	-3.29818	-1.11895	3/27	1230,7071,133522	CCR1,KLF10,PPARGC1B
12_Member	GO Biological Processes	GO:0002761	regulation of myeloid leukocyte differentiation	-3.1674	-1.04305	5/120	1230,7071,9935,10766,133522	CCR1,KLF10,MAFB,TOB2,PPARGC1B
12_Member	GO Biological Processes	GO:1902105	regulation of leukocyte differentiation	-2.88937	-0.869118	7/281	1230,4602,7071,9935,10766,57178,133522	CCR1,MYB,KLF10,MAFB,TOB2,ZMIZ1,PPARGC1B
12_Member	GO Biological Processes	GO:1902107	positive regulation of leukocyte differentiation	-2.71026	-0.76801	5/152	1230,4602,7071,57178,133522	CCR1,MYB,KLF10,ZMIZ1,PPARGC1B
12_Member	GO Biological Processes	GO:1903706	regulation of hemopoiesis	-2.661	-0.736342	9/487	1230,4602,5292,5714,7071,9935,10766,57178,133522	CCR1,MYB,PIM1,PSMD8,KLF10,MAFB,TOB2,ZMIZ1,PPARGC1B
12_Member	GO Biological Processes	GO:0030099	myeloid cell differentiation	-2.47878	-0.628106	8/423	302,998,1230,3717,7071,9935,10766,133522	ANXA2,CDC42,CCR1,JAK2,KLF10,MAFB,TOB2,PPARGC1B
12_Member	GO Biological Processes	GO:0002521	leukocyte differentiation	-2.46103	-0.624797	9/522	302,998,1230,4602,7071,9935,10766,57178,133522	ANXA2,CDC42,CCR1,MYB,KLF10,MAFB,TOB2,ZMIZ1,PPARGC1B
12_Member	GO Biological Processes	GO:0002763	positive regulation of myeloid leukocyte differentiation	-2.37468	-0.578016	3/56	1230,7071,133522	CCR1,KLF10,PPARGC1B
12_Member	GO Biological Processes	GO:1903708	positive regulation of hemopoiesis	-2.23921	-0.498747	5/196	1230,4602,7071,57178,133522	CCR1,MYB,KLF10,ZMIZ1,PPARGC1B
13_Summary	GO Biological Processes	GO:0090022	regulation of neutrophil chemotaxis	-4.41105	-1.78469	4/33	683,728,5879,8291,1230,2896,3717,4064,55601,91662,3162,29108,2950,57688,483,998,2048,7408,64855	BST1,C5AR1,RAC1,DYSF,CCR1,GRN,JAK2,CD180,DDX60,NLRP12,HMOX1,PYCARD,GSTP1,ZSWIM6,ATP1B3,CDC42,EPHB2,VASP,NIBAN2
13_Member	GO Biological Processes	GO:0090022	regulation of neutrophil chemotaxis	-4.41105	-1.78469	4/33	683,728,5879,8291	BST1,C5AR1,RAC1,DYSF
13_Member	GO Biological Processes	GO:1902622	regulation of neutrophil migration	-3.9916	-1.53582	4/42	683,728,5879,8291	BST1,C5AR1,RAC1,DYSF
13_Member	GO Biological Processes	GO:0032103	positive regulation of response to external stimulus	-3.9167	-1.49735	9/325	728,1230,2896,3717,4064,5879,8291,55601,91662	C5AR1,CCR1,GRN,JAK2,CD180,RAC1,DYSF,DDX60,NLRP12
13_Member	GO Biological Processes	GO:0071622	regulation of granulocyte chemotaxis	-3.79898	-1.42926	4/47	683,728,5879,8291	BST1,C5AR1,RAC1,DYSF
13_Member	GO Biological Processes	GO:0002685	regulation of leukocyte migration	-3.70273	-1.37485	7/205	683,728,1230,3162,5879,8291,29108	BST1,C5AR1,CCR1,HMOX1,RAC1,DYSF,PYCARD
13_Member	GO Biological Processes	GO:0050920	regulation of chemotaxis	-3.51611	-1.26115	7/220	683,728,1230,2950,5879,8291,57688	BST1,C5AR1,CCR1,GSTP1,RAC1,DYSF,ZSWIM6
13_Member	GO Biological Processes	GO:0090023	positive regulation of neutrophil chemotaxis	-3.34749	-1.14233	3/26	728,5879,8291	C5AR1,RAC1,DYSF
13_Member	GO Biological Processes	GO:0071624	positive regulation of granulocyte chemotaxis	-3.2508	-1.09306	3/28	728,5879,8291	C5AR1,RAC1,DYSF
13_Member	GO Biological Processes	GO:0002688	regulation of leukocyte chemotaxis	-3.21732	-1.06938	5/117	683,728,1230,5879,8291	BST1,C5AR1,CCR1,RAC1,DYSF
13_Member	GO Biological Processes	GO:0050900	leukocyte migration	-3.13572	-1.02613	10/504	483,683,728,998,1230,3162,5879,8291,29108,91662	ATP1B3,BST1,C5AR1,CDC42,CCR1,HMOX1,RAC1,DYSF,PYCARD,NLRP12
13_Member	GO Biological Processes	GO:1902624	positive regulation of neutrophil migration	-3.11893	-1.01731	3/31	728,5879,8291	C5AR1,RAC1,DYSF
13_Member	GO Biological Processes	GO:0002687	positive regulation of leukocyte migration	-2.93753	-0.898079	5/135	728,1230,5879,8291,29108	C5AR1,CCR1,RAC1,DYSF,PYCARD
13_Member	GO Biological Processes	GO:0002690	positive regulation of leukocyte chemotaxis	-2.74412	-0.786533	4/89	728,1230,5879,8291	C5AR1,CCR1,RAC1,DYSF
13_Member	GO Biological Processes	GO:0030593	neutrophil chemotaxis	-2.55963	-0.671884	4/100	683,728,5879,8291	BST1,C5AR1,RAC1,DYSF
13_Member	GO Biological Processes	GO:0006935	chemotaxis	-2.3352	-0.551752	10/649	683,728,1230,2048,2950,5879,7408,8291,57688,64855	BST1,C5AR1,CCR1,EPHB2,GSTP1,RAC1,VASP,DYSF,ZSWIM6,NIBAN2
13_Member	GO Biological Processes	GO:0042330	taxis	-2.32596	-0.547181	10/651	683,728,1230,2048,2950,5879,7408,8291,57688,64855	BST1,C5AR1,CCR1,EPHB2,GSTP1,RAC1,VASP,DYSF,ZSWIM6,NIBAN2
13_Member	GO Biological Processes	GO:1990266	neutrophil migration	-2.31577	-0.540983	4/117	683,728,5879,8291	BST1,C5AR1,RAC1,DYSF
13_Member	GO Biological Processes	GO:0071621	granulocyte chemotaxis	-2.28979	-0.529395	4/119	683,728,5879,8291	BST1,C5AR1,RAC1,DYSF
13_Member	GO Biological Processes	GO:0097529	myeloid leukocyte migration	-2.09883	-0.407087	5/212	683,728,1230,5879,8291	BST1,C5AR1,CCR1,RAC1,DYSF
13_Member	GO Biological Processes	GO:0050921	positive regulation of chemotaxis	-2.07673	-0.394112	4/137	728,1230,5879,8291	C5AR1,CCR1,RAC1,DYSF
13_Member	GO Biological Processes	GO:0060326	cell chemotaxis	-2.06006	-0.38342	6/304	683,728,1230,2950,5879,8291	BST1,C5AR1,CCR1,GSTP1,RAC1,DYSF
13_Member	GO Biological Processes	GO:0097530	granulocyte migration	-2.04444	-0.370751	4/140	683,728,5879,8291	BST1,C5AR1,RAC1,DYSF
13_Member	GO Biological Processes	GO:0030595	leukocyte chemotaxis	-2.00972	-0.348624	5/223	683,728,1230,5879,8291	BST1,C5AR1,CCR1,RAC1,DYSF
14_Summary	KEGG Pathway	M00002	glycolysis, core module involving three-carbon compounds	-4.39422	-1.78469	3/12	2023,2597,5315,217,5106,2752,3417,847,683,2876,2950,3162,5164,5879,4923,11261,80896,5836	ENO1,GAPDH,PKM,ALDH2,PCK2,GLUL,IDH1,CAT,BST1,GPX1,GSTP1,HMOX1,PDK2,RAC1,NTSR1,CHP1,NPL,PYGL
14_Member	KEGG Pathway	M00002	glycolysis, core module involving three-carbon compounds	-4.39422	-1.78469	3/12	2023,2597,5315	ENO1,GAPDH,PKM
14_Member	KEGG Pathway	hsa_M00002	glycolysis, core module involving three-carbon compounds	-4.39422	-1.78469	3/12	2023,2597,5315	ENO1,GAPDH,PKM
14_Member	KEGG Pathway	hsa00010	glycolysis/gluconeogenesis	-4.35612	-1.76941	5/67	217,2023,2597,5106,5315	ALDH2,ENO1,GAPDH,PCK2,PKM
14_Member	KEGG Pathway	hsa01230	biosynthesis of amino acids	-4.12008	-1.60716	5/75	2023,2597,2752,3417,5315	ENO1,GAPDH,GLUL,IDH1,PKM
14_Member	KEGG Pathway	M00003	gluconeogenesis, oxaloacetate => fructose-6P	-3.91337	-1.49735	3/17	2023,2597,5106	ENO1,GAPDH,PCK2
14_Member	KEGG Pathway	hsa_M00003	gluconeogenesis, oxaloacetate => fructose-6P	-3.91337	-1.49735	3/17	2023,2597,5106	ENO1,GAPDH,PCK2
14_Member	KEGG Pathway	M00001	glycolysis (Embden-Meyerhof pathway), glucose => pyruvate	-3.3989	-1.18016	3/25	2023,2597,5315	ENO1,GAPDH,PKM
14_Member	KEGG Pathway	hsa_M00001	glycolysis (Embden-Meyerhof pathway), glucose => pyruvate	-3.3989	-1.18016	3/25	2023,2597,5315	ENO1,GAPDH,PKM
14_Member	GO Biological Processes	GO:0006735	NADH regeneration	-3.29818	-1.11895	3/27	2023,2597,5315	ENO1,GAPDH,PKM
14_Member	GO Biological Processes	GO:0061621	canonical glycolysis	-3.29818	-1.11895	3/27	2023,2597,5315	ENO1,GAPDH,PKM
14_Member	GO Biological Processes	GO:0061718	glucose catabolic process to pyruvate	-3.29818	-1.11895	3/27	2023,2597,5315	ENO1,GAPDH,PKM
14_Member	KEGG Pathway	hsa01200	carbon metabolism	-3.26871	-1.09574	5/114	847,2023,2597,3417,5315	CAT,ENO1,GAPDH,IDH1,PKM
14_Member	GO Biological Processes	GO:0061620	glycolytic process through glucose-6-phosphate	-3.2508	-1.09306	3/28	2023,2597,5315	ENO1,GAPDH,PKM
14_Member	GO Biological Processes	GO:0061615	glycolytic process through fructose-6-phosphate	-3.20522	-1.06685	3/29	2023,2597,5315	ENO1,GAPDH,PKM
14_Member	GO Biological Processes	GO:0051186	cofactor metabolic process	-3.06389	-0.970089	11/609	683,847,2023,2597,2876,2950,3162,3417,5164,5315,5879	BST1,CAT,ENO1,GAPDH,GPX1,GSTP1,HMOX1,IDH1,PDK2,PKM,RAC1
14_Member	Reactome Gene Sets	R-HSA-70263	gluconeogenesis	-3.00018	-0.932159	3/34	2023,2597,5106	ENO1,GAPDH,PCK2
14_Member	GO Biological Processes	GO:0019674	NAD metabolic process	-2.97718	-0.913349	4/77	683,2023,2597,5315	BST1,ENO1,GAPDH,PKM
14_Member	GO Biological Processes	GO:0044282	small molecule catabolic process	-2.92827	-0.898079	9/445	217,2023,2597,2752,4923,5106,5315,11261,80896	ALDH2,ENO1,GAPDH,GLUL,NTSR1,PCK2,PKM,CHP1,NPL
14_Member	GO Biological Processes	GO:0006007	glucose catabolic process	-2.92715	-0.898079	3/36	2023,2597,5315	ENO1,GAPDH,PKM
14_Member	KEGG Pathway	hsa00620	pyruvate metabolism	-2.82546	-0.831013	3/39	217,5106,5315	ALDH2,PCK2,PKM
14_Member	GO Biological Processes	GO:0006734	NADH metabolic process	-2.73191	-0.780898	3/42	2023,2597,5315	ENO1,GAPDH,PKM
14_Member	GO Biological Processes	GO:0006094	gluconeogenesis	-2.70872	-0.76801	4/91	2023,2597,5106,5164	ENO1,GAPDH,PCK2,PDK2
14_Member	Reactome Gene Sets	R-HSA-70326	glucose metabolism	-2.70872	-0.76801	4/91	2023,2597,5106,5315	ENO1,GAPDH,PCK2,PKM
14_Member	GO Biological Processes	GO:0006090	pyruvate metabolic process	-2.67324	-0.743301	5/155	2023,2597,5106,5164,5315	ENO1,GAPDH,PCK2,PDK2,PKM
14_Member	GO Biological Processes	GO:0019319	hexose biosynthetic process	-2.65723	-0.734326	4/94	2023,2597,5106,5164	ENO1,GAPDH,PCK2,PDK2
14_Member	GO Biological Processes	GO:0046364	monosaccharide biosynthetic process	-2.55963	-0.671884	4/100	2023,2597,5106,5164	ENO1,GAPDH,PCK2,PDK2
14_Member	GO Biological Processes	GO:0046434	organophosphate catabolic process	-2.47346	-0.628106	6/249	2023,2597,2876,3417,4923,5315	ENO1,GAPDH,GPX1,IDH1,NTSR1,PKM
14_Member	GO Biological Processes	GO:0009435	NAD biosynthetic process	-2.37468	-0.578016	3/56	2023,2597,5315	ENO1,GAPDH,PKM
14_Member	GO Biological Processes	GO:0019320	hexose catabolic process	-2.35302	-0.564116	3/57	2023,2597,5315	ENO1,GAPDH,PKM
14_Member	GO Biological Processes	GO:0019362	pyridine nucleotide metabolic process	-2.27652	-0.519705	5/192	683,2023,2597,3417,5315	BST1,ENO1,GAPDH,IDH1,PKM
14_Member	GO Biological Processes	GO:0046496	nicotinamide nucleotide metabolic process	-2.27652	-0.519705	5/192	683,2023,2597,3417,5315	BST1,ENO1,GAPDH,IDH1,PKM
14_Member	GO Biological Processes	GO:0072524	pyridine-containing compound metabolic process	-2.21184	-0.482684	5/199	683,2023,2597,3417,5315	BST1,ENO1,GAPDH,IDH1,PKM
14_Member	Canonical Pathways	M255	PID HIF1 TF pathway	-2.17522	-0.454906	3/66	2023,3162,5315	ENO1,HMOX1,PKM
14_Member	GO Biological Processes	GO:0046365	monosaccharide catabolic process	-2.15715	-0.443346	3/67	2023,2597,5315	ENO1,GAPDH,PKM
14_Member	Reactome Gene Sets	R-HSA-71387	metabolism of carbohydrates	-2.12084	-0.422908	6/295	2023,2597,5106,5315,5836,11261	ENO1,GAPDH,PCK2,PKM,PYGL,CHP1
14_Member	GO Biological Processes	GO:0006733	oxidoreduction coenzyme metabolic process	-2.10721	-0.41436	5/211	683,2023,2597,3417,5315	BST1,ENO1,GAPDH,IDH1,PKM
14_Member	GO Biological Processes	GO:0006006	glucose metabolic process	-2.09049	-0.401812	5/213	2023,2597,5106,5164,5315	ENO1,GAPDH,PCK2,PDK2,PKM
14_Member	Reactome Gene Sets	R-HSA-70171	glycolysis	-2.08775	-0.401104	3/71	2023,2597,5315	ENO1,GAPDH,PKM
14_Member	GO Biological Processes	GO:0016051	carbohydrate biosynthetic process	-2.0822	-0.396565	5/214	2023,2597,4923,5106,5164	ENO1,GAPDH,NTSR1,PCK2,PDK2
15_Summary	GO Biological Processes	GO:0045088	regulation of innate immune response	-4.17657	-1.64985	11/451	2219,2896,3717,5359,5714,10695,11274,29108,51311,55601,79671,302,2597,4064,27074,91662,728,998,3783,5199,5879,1512,671,10964,3162,4602,8417,2023	FCN1,GRN,JAK2,PLSCR1,PSMD8,CNPY3,USP18,PYCARD,TLR8,DDX60,NLRX1,ANXA2,GAPDH,CD180,LAMP3,NLRP12,C5AR1,CDC42,KCNN4,CFP,RAC1,CTSH,BPI,IFI44L,HMOX1,MYB,STX7,ENO1
15_Member	GO Biological Processes	GO:0045088	regulation of innate immune response	-4.17657	-1.64985	11/451	2219,2896,3717,5359,5714,10695,11274,29108,51311,55601,79671	FCN1,GRN,JAK2,PLSCR1,PSMD8,CNPY3,USP18,PYCARD,TLR8,DDX60,NLRX1
15_Member	GO Biological Processes	GO:0043900	regulation of multi-organism process	-3.82484	-1.43796	10/412	302,2219,2597,2896,4064,5359,27074,29108,55601,79671	ANXA2,FCN1,GAPDH,GRN,CD180,PLSCR1,LAMP3,PYCARD,DDX60,NLRX1
15_Member	GO Biological Processes	GO:0031349	positive regulation of defense response	-3.65774	-1.35147	11/517	2219,2896,3717,5359,5714,10695,29108,51311,55601,79671,91662	FCN1,GRN,JAK2,PLSCR1,PSMD8,CNPY3,PYCARD,TLR8,DDX60,NLRX1,NLRP12
15_Member	GO Biological Processes	GO:0002253	activation of immune response	-3.46933	-1.23301	13/731	728,998,2219,3783,5199,5359,5714,5879,10695,29108,51311,55601,79671	C5AR1,CDC42,FCN1,KCNN4,CFP,PLSCR1,PSMD8,RAC1,CNPY3,PYCARD,TLR8,DDX60,NLRX1
15_Member	GO Biological Processes	GO:0002764	immune response-regulating signaling pathway	-3.20411	-1.06685	12/681	728,998,1512,2219,3783,5359,5714,5879,10695,51311,55601,79671	C5AR1,CDC42,CTSH,FCN1,KCNN4,PLSCR1,PSMD8,RAC1,CNPY3,TLR8,DDX60,NLRX1
15_Member	GO Biological Processes	GO:0098542	defense response to other organism	-3.14021	-1.02793	11/596	671,728,2597,2896,5199,5359,10964,29108,51311,55601,79671	BPI,C5AR1,GAPDH,GRN,CFP,PLSCR1,IFI44L,PYCARD,TLR8,DDX60,NLRX1
15_Member	GO Biological Processes	GO:0002757	immune response-activating signal transduction	-2.8531	-0.83935	11/647	728,998,2219,3783,5359,5714,5879,10695,51311,55601,79671	C5AR1,CDC42,FCN1,KCNN4,PLSCR1,PSMD8,RAC1,CNPY3,TLR8,DDX60,NLRX1
15_Member	GO Biological Processes	GO:0002831	regulation of response to biotic stimulus	-2.84013	-0.838577	5/142	2896,4064,29108,55601,79671	GRN,CD180,PYCARD,DDX60,NLRX1
15_Member	GO Biological Processes	GO:0002697	regulation of immune effector process	-2.79061	-0.815895	9/466	728,2896,3162,4602,5199,8417,29108,55601,79671	C5AR1,GRN,HMOX1,MYB,CFP,STX7,PYCARD,DDX60,NLRX1
15_Member	GO Biological Processes	GO:0045089	positive regulation of innate immune response	-2.75065	-0.787568	8/382	2219,5359,5714,10695,29108,51311,55601,79671	FCN1,PLSCR1,PSMD8,CNPY3,PYCARD,TLR8,DDX60,NLRX1
15_Member	GO Biological Processes	GO:0002833	positive regulation of response to biotic stimulus	-2.5911	-0.695821	3/47	2896,4064,55601	GRN,CD180,DDX60
15_Member	GO Biological Processes	GO:0002218	activation of innate immune response	-2.54094	-0.661057	7/324	2219,5714,10695,29108,51311,55601,79671	FCN1,PSMD8,CNPY3,PYCARD,TLR8,DDX60,NLRX1
15_Member	GO Biological Processes	GO:0051607	defense response to virus	-2.48202	-0.629784	6/248	5359,10964,29108,51311,55601,79671	PLSCR1,IFI44L,PYCARD,TLR8,DDX60,NLRX1
15_Member	GO Biological Processes	GO:0009615	response to virus	-2.46829	-0.628106	7/334	2023,5359,10964,29108,51311,55601,79671	ENO1,PLSCR1,IFI44L,PYCARD,TLR8,DDX60,NLRX1
15_Member	GO Biological Processes	GO:0002221	pattern recognition receptor signaling pathway	-2.20283	-0.475898	5/200	2219,10695,51311,55601,79671	FCN1,CNPY3,TLR8,DDX60,NLRX1
15_Member	GO Biological Processes	GO:0002758	innate immune response-activating signal transduction	-2.08006	-0.395428	6/301	2219,5714,10695,51311,55601,79671	FCN1,PSMD8,CNPY3,TLR8,DDX60,NLRX1
15_Member	GO Biological Processes	GO:0050688	regulation of defense response to virus	-2.02261	-0.356719	3/75	29108,55601,79671	PYCARD,DDX60,NLRX1
16_Summary	GO Biological Processes	GO:0051051	negative regulation of transport	-4.10086	-1.6069	12/543	2048,3162,4923,5879,6386,8291,11261,51009,51311,54899,91404,91662,483,967,5292,1230	EPHB2,HMOX1,NTSR1,RAC1,SDCBP,DYSF,CHP1,DERL2,TLR8,PXK,SESTD1,NLRP12,ATP1B3,CD63,PIM1,CCR1
16_Member	GO Biological Processes	GO:0051051	negative regulation of transport	-4.10086	-1.6069	12/543	2048,3162,4923,5879,6386,8291,11261,51009,51311,54899,91404,91662	EPHB2,HMOX1,NTSR1,RAC1,SDCBP,DYSF,CHP1,DERL2,TLR8,PXK,SESTD1,NLRP12
16_Member	GO Biological Processes	GO:1904063	negative regulation of cation transmembrane transport	-2.62393	-0.713064	4/96	2048,4923,8291,91404	EPHB2,NTSR1,DYSF,SESTD1
16_Member	GO Biological Processes	GO:1903170	negative regulation of calcium ion transmembrane transport	-2.5911	-0.695821	3/47	4923,8291,91404	NTSR1,DYSF,SESTD1
16_Member	GO Biological Processes	GO:0043271	negative regulation of ion transport	-2.59005	-0.695821	5/162	2048,4923,8291,54899,91404	EPHB2,NTSR1,DYSF,PXK,SESTD1
16_Member	GO Biological Processes	GO:0032414	positive regulation of ion transmembrane transporter activity	-2.48324	-0.629784	4/105	483,2048,4923,11261	ATP1B3,EPHB2,NTSR1,CHP1
16_Member	GO Biological Processes	GO:0034766	negative regulation of ion transmembrane transport	-2.43938	-0.618589	4/108	2048,4923,8291,91404	EPHB2,NTSR1,DYSF,SESTD1
16_Member	GO Biological Processes	GO:1904062	regulation of cation transmembrane transport	-2.3984	-0.591181	7/344	483,967,2048,4923,8291,11261,91404	ATP1B3,CD63,EPHB2,NTSR1,DYSF,CHP1,SESTD1
16_Member	GO Biological Processes	GO:0032411	positive regulation of transporter activity	-2.36931	-0.573948	4/113	483,2048,4923,11261	ATP1B3,EPHB2,NTSR1,CHP1
16_Member	GO Biological Processes	GO:0022898	regulation of transmembrane transporter activity	-2.27246	-0.516838	6/274	483,2048,4923,5292,8291,11261	ATP1B3,EPHB2,NTSR1,PIM1,DYSF,CHP1
16_Member	GO Biological Processes	GO:0032409	regulation of transporter activity	-2.16271	-0.446746	6/289	483,2048,4923,5292,8291,11261	ATP1B3,EPHB2,NTSR1,PIM1,DYSF,CHP1
16_Member	GO Biological Processes	GO:0034763	negative regulation of transmembrane transport	-2.12112	-0.422908	4/133	2048,4923,8291,91404	EPHB2,NTSR1,DYSF,SESTD1
16_Member	GO Biological Processes	GO:0051926	negative regulation of calcium ion transport	-2.07109	-0.391468	3/72	4923,8291,91404	NTSR1,DYSF,SESTD1
16_Member	GO Biological Processes	GO:0010959	regulation of metal ion transport	-2.06247	-0.384843	7/398	483,967,1230,4923,8291,11261,91404	ATP1B3,CD63,CCR1,NTSR1,DYSF,CHP1,SESTD1
16_Member	GO Biological Processes	GO:1904064	positive regulation of cation transmembrane transport	-2.00263	-0.342491	4/144	483,2048,4923,11261	ATP1B3,EPHB2,NTSR1,CHP1
17_Summary	GO Biological Processes	GO:0051402	neuron apoptotic process	-4.04981	-1.5758	8/243	728,998,2597,2896,3162,3717,4296,4602,11261,1512,4923,23786,29108,91662,2950,6386,2023,2876,4193,10783,51009,5606	C5AR1,CDC42,GAPDH,GRN,HMOX1,JAK2,MAP3K11,MYB,CHP1,CTSH,NTSR1,BCL2L13,PYCARD,NLRP12,GSTP1,SDCBP,ENO1,GPX1,MDM2,NEK6,DERL2,MAP2K3
17_Member	GO Biological Processes	GO:0051402	neuron apoptotic process	-4.04981	-1.5758	8/243	728,998,2597,2896,3162,3717,4296,4602	C5AR1,CDC42,GAPDH,GRN,HMOX1,JAK2,MAP3K11,MYB
17_Member	GO Biological Processes	GO:0070997	neuron death	-3.63081	-1.33777	9/355	728,998,2597,2896,3162,3717,4296,4602,11261	C5AR1,CDC42,GAPDH,GRN,HMOX1,JAK2,MAP3K11,MYB,CHP1
17_Member	GO Biological Processes	GO:0043523	regulation of neuron apoptotic process	-3.60126	-1.31958	7/213	728,998,2896,3162,3717,4296,4602	C5AR1,CDC42,GRN,HMOX1,JAK2,MAP3K11,MYB
17_Member	GO Biological Processes	GO:0043525	positive regulation of neuron apoptotic process	-3.4155	-1.18794	4/59	998,2896,4296,4602	CDC42,GRN,MAP3K11,MYB
17_Member	GO Biological Processes	GO:1901214	regulation of neuron death	-3.26047	-1.09365	8/318	728,998,2896,3162,3717,4296,4602,11261	C5AR1,CDC42,GRN,HMOX1,JAK2,MAP3K11,MYB,CHP1
17_Member	GO Biological Processes	GO:0043065	positive regulation of apoptotic process	-3.2153	-1.06938	12/679	998,1512,2597,2896,3162,3717,4296,4602,4923,23786,29108,91662	CDC42,CTSH,GAPDH,GRN,HMOX1,JAK2,MAP3K11,MYB,NTSR1,BCL2L13,PYCARD,NLRP12
17_Member	GO Biological Processes	GO:0043068	positive regulation of programmed cell death	-3.1653	-1.04305	12/688	998,1512,2597,2896,3162,3717,4296,4602,4923,23786,29108,91662	CDC42,CTSH,GAPDH,GRN,HMOX1,JAK2,MAP3K11,MYB,NTSR1,BCL2L13,PYCARD,NLRP12
17_Member	GO Biological Processes	GO:0010942	positive regulation of cell death	-2.89836	-0.873719	12/739	998,1512,2597,2896,3162,3717,4296,4602,4923,23786,29108,91662	CDC42,CTSH,GAPDH,GRN,HMOX1,JAK2,MAP3K11,MYB,NTSR1,BCL2L13,PYCARD,NLRP12
17_Member	GO Biological Processes	GO:1901216	positive regulation of neuron death	-2.60757	-0.704103	4/97	998,2896,4296,4602	CDC42,GRN,MAP3K11,MYB
17_Member	GO Biological Processes	GO:0046328	regulation of JNK cascade	-2.35405	-0.564116	5/184	998,2950,4296,6386,29108	CDC42,GSTP1,MAP3K11,SDCBP,PYCARD
17_Member	GO Biological Processes	GO:0080135	regulation of cellular response to stress	-2.29722	-0.531996	11/765	998,2023,2876,2896,2950,4193,4296,6386,10783,29108,51009	CDC42,ENO1,GPX1,GRN,GSTP1,MDM2,MAP3K11,SDCBP,NEK6,PYCARD,DERL2
17_Member	GO Biological Processes	GO:0051403	stress-activated MAPK cascade	-2.17691	-0.455504	6/287	998,2950,4296,5606,6386,29108	CDC42,GSTP1,MAP3K11,MAP2K3,SDCBP,PYCARD
17_Member	GO Biological Processes	GO:0007254	JNK cascade	-2.09049	-0.401812	5/213	998,2950,4296,6386,29108	CDC42,GSTP1,MAP3K11,SDCBP,PYCARD
17_Member	GO Biological Processes	GO:0046330	positive regulation of JNK cascade	-2.07673	-0.394112	4/137	998,4296,6386,29108	CDC42,MAP3K11,SDCBP,PYCARD
18_Summary	Canonical Pathways	M238	PID thrombin PAR1 pathway	-3.95114	-1.50127	4/43	157,2769,7408,7791,998,2048,4296,5879	GRK3,GNA15,VASP,ZYX,CDC42,EPHB2,MAP3K11,RAC1
18_Member	Canonical Pathways	M238	PID thrombin PAR1 pathway	-3.95114	-1.50127	4/43	157,2769,7408,7791	GRK3,GNA15,VASP,ZYX
18_Member	Canonical Pathways	M3270	ST integrin signaling pathway	-3.93527	-1.49735	5/82	998,2048,4296,7408,7791	CDC42,EPHB2,MAP3K11,VASP,ZYX
18_Member	Canonical Pathways	M184	PID E-cadherin keratinocyte pathway	-3.6294	-1.33777	3/21	5879,7408,7791	RAC1,VASP,ZYX
18_Member	Canonical Pathways	M99	PID TXA2 pathway	-2.35302	-0.564116	3/57	157,2769,5879	GRK3,GNA15,RAC1
19_Summary	GO Biological Processes	GO:0055080	cation homeostasis	-3.92971	-1.49735	14/748	302,483,728,1230,2769,2896,3162,3717,4923,5158,5164,11261,25800,26234	ANXA2,ATP1B3,C5AR1,CCR1,GNA15,GRN,HMOX1,JAK2,NTSR1,PDE6B,PDK2,CHP1,SLC39A6,FBXL5
19_Member	GO Biological Processes	GO:0055080	cation homeostasis	-3.92971	-1.49735	14/748	302,483,728,1230,2769,2896,3162,3717,4923,5158,5164,11261,25800,26234	ANXA2,ATP1B3,C5AR1,CCR1,GNA15,GRN,HMOX1,JAK2,NTSR1,PDE6B,PDK2,CHP1,SLC39A6,FBXL5
19_Member	GO Biological Processes	GO:0098771	inorganic ion homeostasis	-3.86368	-1.46365	14/759	302,483,728,1230,2769,2896,3162,3717,4923,5158,5164,11261,25800,26234	ANXA2,ATP1B3,C5AR1,CCR1,GNA15,GRN,HMOX1,JAK2,NTSR1,PDE6B,PDK2,CHP1,SLC39A6,FBXL5
19_Member	GO Biological Processes	GO:0030003	cellular cation homeostasis	-3.82257	-1.43796	13/672	302,483,728,1230,2769,2896,3162,3717,4923,5158,11261,25800,26234	ANXA2,ATP1B3,C5AR1,CCR1,GNA15,GRN,HMOX1,JAK2,NTSR1,PDE6B,CHP1,SLC39A6,FBXL5
19_Member	GO Biological Processes	GO:0006873	cellular ion homeostasis	-3.74119	-1.39521	13/685	302,483,728,1230,2769,2896,3162,3717,4923,5158,11261,25800,26234	ANXA2,ATP1B3,C5AR1,CCR1,GNA15,GRN,HMOX1,JAK2,NTSR1,PDE6B,CHP1,SLC39A6,FBXL5
19_Member	GO Biological Processes	GO:0006875	cellular metal ion homeostasis	-3.14021	-1.02793	11/596	302,483,728,1230,2769,3162,3717,4923,5158,25800,26234	ANXA2,ATP1B3,C5AR1,CCR1,GNA15,HMOX1,JAK2,NTSR1,PDE6B,SLC39A6,FBXL5
19_Member	GO Biological Processes	GO:0055065	metal ion homeostasis	-2.74391	-0.786533	11/668	302,483,728,1230,2769,3162,3717,4923,5158,25800,26234	ANXA2,ATP1B3,C5AR1,CCR1,GNA15,HMOX1,JAK2,NTSR1,PDE6B,SLC39A6,FBXL5
19_Member	GO Biological Processes	GO:0051480	regulation of cytosolic calcium ion concentration	-2.20992	-0.481881	7/373	302,728,1230,2769,3717,4923,5158	ANXA2,C5AR1,CCR1,GNA15,JAK2,NTSR1,PDE6B
19_Member	GO Biological Processes	GO:0072503	cellular divalent inorganic cation homeostasis	-2.01913	-0.355539	8/507	302,728,1230,2769,3717,4923,5158,25800	ANXA2,C5AR1,CCR1,GNA15,JAK2,NTSR1,PDE6B,SLC39A6
20_Summary	GO Biological Processes	GO:1903362	regulation of cellular protein catabolic process	-3.92867	-1.49735	8/253	302,2876,4193,6386,26234,27074,51009,90637,8291,5714,130617,1512,11274,334,2597	ANXA2,GPX1,MDM2,SDCBP,FBXL5,LAMP3,DERL2,ZFAND2A,DYSF,PSMD8,ZFAND2B,CTSH,USP18,APLP2,GAPDH
20_Member	GO Biological Processes	GO:1903362	regulation of cellular protein catabolic process	-3.92867	-1.49735	8/253	302,2876,4193,6386,26234,27074,51009,90637	ANXA2,GPX1,MDM2,SDCBP,FBXL5,LAMP3,DERL2,ZFAND2A
20_Member	GO Biological Processes	GO:0042176	regulation of protein catabolic process	-3.3331	-1.13785	9/390	302,2876,4193,6386,8291,26234,27074,51009,90637	ANXA2,GPX1,MDM2,SDCBP,DYSF,FBXL5,LAMP3,DERL2,ZFAND2A
20_Member	GO Biological Processes	GO:0061136	regulation of proteasomal protein catabolic process	-3.09007	-0.991074	6/188	2876,4193,6386,27074,51009,90637	GPX1,MDM2,SDCBP,LAMP3,DERL2,ZFAND2A
20_Member	GO Biological Processes	GO:0042177	negative regulation of protein catabolic process	-2.96644	-0.905012	5/133	302,6386,8291,27074,51009	ANXA2,SDCBP,DYSF,LAMP3,DERL2
20_Member	GO Biological Processes	GO:1903363	negative regulation of cellular protein catabolic process	-2.78042	-0.809623	4/87	302,6386,27074,51009	ANXA2,SDCBP,LAMP3,DERL2
20_Member	GO Biological Processes	GO:1903050	regulation of proteolysis involved in cellular protein catabolic process	-2.74063	-0.785134	6/220	2876,4193,6386,27074,51009,90637	GPX1,MDM2,SDCBP,LAMP3,DERL2,ZFAND2A
20_Member	GO Biological Processes	GO:0010498	proteasomal protein catabolic process	-2.70335	-0.764456	9/480	2876,4193,5714,6386,26234,27074,51009,90637,130617	GPX1,MDM2,PSMD8,SDCBP,FBXL5,LAMP3,DERL2,ZFAND2A,ZFAND2B
20_Member	GO Biological Processes	GO:0044257	cellular protein catabolic process	-2.67473	-0.743301	12/786	302,1512,2876,4193,5714,6386,11274,26234,27074,51009,90637,130617	ANXA2,CTSH,GPX1,MDM2,PSMD8,SDCBP,USP18,FBXL5,LAMP3,DERL2,ZFAND2A,ZFAND2B
20_Member	GO Biological Processes	GO:0051603	proteolysis involved in cellular protein catabolic process	-2.45279	-0.623643	11/729	1512,2876,4193,5714,6386,11274,26234,27074,51009,90637,130617	CTSH,GPX1,MDM2,PSMD8,SDCBP,USP18,FBXL5,LAMP3,DERL2,ZFAND2A,ZFAND2B
20_Member	GO Biological Processes	GO:1901799	negative regulation of proteasomal protein catabolic process	-2.31094	-0.53838	3/59	6386,27074,51009	SDCBP,LAMP3,DERL2
20_Member	GO Biological Processes	GO:0045861	negative regulation of proteolysis	-2.24101	-0.498747	7/368	334,2597,2876,4193,6386,27074,51009	APLP2,GAPDH,GPX1,MDM2,SDCBP,LAMP3,DERL2
20_Member	GO Biological Processes	GO:1903051	negative regulation of proteolysis involved in cellular protein catabolic process	-2.03852	-0.366802	3/74	6386,27074,51009	SDCBP,LAMP3,DERL2

## Sheet: Hypo-Up
Supplementary Table 4. Biological process and pathway categories of DEGs with ac4C hyper or hypo.
ac4C Hypo-Up gene set.
GroupID	Category	Term	Description	LogP	Log(q-value)	InTerm_InList	Genes	Symbols
1_Summary	GO Biological Processes	GO:0045055	regulated exocytosis	-7.75954	-3.85385	18/796	535,695,1378,2934,3074,3101,3959,4860,5269,6678,6809,6845,7097,7520,8972,10890,11031,79930,4055	ATP6V0A1,BTK,CR1,GSN,HEXB,HK3,LGALS3BP,PNP,SERPINB6,SPARC,STX3,VAMP7,TLR2,XRCC5,MGAM,RAB10,RAB31,DOK3,LTBR
1_Member	GO Biological Processes	GO:0045055	regulated exocytosis	-7.75954	-3.85385	18/796	535,695,1378,2934,3074,3101,3959,4860,5269,6678,6809,6845,7097,7520,8972,10890,11031,79930	ATP6V0A1,BTK,CR1,GSN,HEXB,HK3,LGALS3BP,PNP,SERPINB6,SPARC,STX3,VAMP7,TLR2,XRCC5,MGAM,RAB10,RAB31,DOK3
1_Member	GO Biological Processes	GO:0043299	leukocyte degranulation	-7.70708	-3.85385	15/537	535,695,1378,2934,3074,3101,4860,5269,6845,7097,7520,8972,10890,11031,79930	ATP6V0A1,BTK,CR1,GSN,HEXB,HK3,PNP,SERPINB6,VAMP7,TLR2,XRCC5,MGAM,RAB10,RAB31,DOK3
1_Member	GO Biological Processes	GO:0002275	myeloid cell activation involved in immune response	-7.60137	-3.85385	15/547	535,695,1378,2934,3074,3101,4860,5269,6845,7097,7520,8972,10890,11031,79930	ATP6V0A1,BTK,CR1,GSN,HEXB,HK3,PNP,SERPINB6,VAMP7,TLR2,XRCC5,MGAM,RAB10,RAB31,DOK3
1_Member	GO Biological Processes	GO:0002444	myeloid leukocyte mediated immunity	-7.51843	-3.85385	15/555	535,695,1378,2934,3074,3101,4860,5269,6845,7097,7520,8972,10890,11031,79930	ATP6V0A1,BTK,CR1,GSN,HEXB,HK3,PNP,SERPINB6,VAMP7,TLR2,XRCC5,MGAM,RAB10,RAB31,DOK3
1_Member	GO Biological Processes	GO:0002274	myeloid leukocyte activation	-7.37806	-3.85385	16/656	535,695,1378,2934,3074,3101,4055,4860,5269,6845,7097,7520,8972,10890,11031,79930	ATP6V0A1,BTK,CR1,GSN,HEXB,HK3,LTBR,PNP,SERPINB6,VAMP7,TLR2,XRCC5,MGAM,RAB10,RAB31,DOK3
1_Member	GO Biological Processes	GO:0043312	neutrophil degranulation	-7.36079	-3.85385	14/488	535,1378,2934,3074,3101,4860,5269,6845,7097,7520,8972,10890,11031,79930	ATP6V0A1,CR1,GSN,HEXB,HK3,PNP,SERPINB6,VAMP7,TLR2,XRCC5,MGAM,RAB10,RAB31,DOK3
1_Member	GO Biological Processes	GO:0002283	neutrophil activation involved in immune response	-7.32786	-3.85385	14/491	535,1378,2934,3074,3101,4860,5269,6845,7097,7520,8972,10890,11031,79930	ATP6V0A1,CR1,GSN,HEXB,HK3,PNP,SERPINB6,VAMP7,TLR2,XRCC5,MGAM,RAB10,RAB31,DOK3
1_Member	GO Biological Processes	GO:0042119	neutrophil activation	-7.21977	-3.84424	14/501	535,1378,2934,3074,3101,4860,5269,6845,7097,7520,8972,10890,11031,79930	ATP6V0A1,CR1,GSN,HEXB,HK3,PNP,SERPINB6,VAMP7,TLR2,XRCC5,MGAM,RAB10,RAB31,DOK3
1_Member	GO Biological Processes	GO:0002446	neutrophil mediated immunity	-7.2091	-3.84424	14/502	535,1378,2934,3074,3101,4860,5269,6845,7097,7520,8972,10890,11031,79930	ATP6V0A1,CR1,GSN,HEXB,HK3,PNP,SERPINB6,VAMP7,TLR2,XRCC5,MGAM,RAB10,RAB31,DOK3
1_Member	GO Biological Processes	GO:0036230	granulocyte activation	-7.15612	-3.83702	14/507	535,1378,2934,3074,3101,4860,5269,6845,7097,7520,8972,10890,11031,79930	ATP6V0A1,CR1,GSN,HEXB,HK3,PNP,SERPINB6,VAMP7,TLR2,XRCC5,MGAM,RAB10,RAB31,DOK3
1_Member	Reactome Gene Sets	R-HSA-6798695	neutrophil degranulation	-6.57751	-3.29979	13/480	535,1378,2934,3074,3101,4860,5269,7097,7520,8972,10890,11031,79930	ATP6V0A1,CR1,GSN,HEXB,HK3,PNP,SERPINB6,TLR2,XRCC5,MGAM,RAB10,RAB31,DOK3
1_Member	GO Biological Processes	GO:0002366	leukocyte activation involved in immune response	-6.13768	-2.90206	15/711	535,695,1378,2934,3074,3101,4860,5269,6845,7097,7520,8972,10890,11031,79930	ATP6V0A1,BTK,CR1,GSN,HEXB,HK3,PNP,SERPINB6,VAMP7,TLR2,XRCC5,MGAM,RAB10,RAB31,DOK3
1_Member	GO Biological Processes	GO:0002263	cell activation involved in immune response	-6.10722	-2.90206	15/715	535,695,1378,2934,3074,3101,4860,5269,6845,7097,7520,8972,10890,11031,79930	ATP6V0A1,BTK,CR1,GSN,HEXB,HK3,PNP,SERPINB6,VAMP7,TLR2,XRCC5,MGAM,RAB10,RAB31,DOK3
2_Summary	GO Biological Processes	GO:0044282	small molecule catabolic process	-4.46635	-1.29337	10/445	669,2166,3074,3101,3632,4051,4860,10295,56898,64087,1066,2180,51660,79746,7097,414,54947,79887,83930,162466	BPGM,FAAH,HEXB,HK3,INPP5A,CYP4F3,PNP,BCKDK,BDH2,MCCC2,CES1,ACSL1,MPC1,ECHDC3,TLR2,ARSD,LPCAT2,PLBD1,STARD3NL,PHOSPHO1
2_Member	GO Biological Processes	GO:0044282	small molecule catabolic process	-4.46635	-1.29337	10/445	669,2166,3074,3101,3632,4051,4860,10295,56898,64087	BPGM,FAAH,HEXB,HK3,INPP5A,CYP4F3,PNP,BCKDK,BDH2,MCCC2
2_Member	GO Biological Processes	GO:0032787	monocarboxylic acid metabolic process	-3.13423	-0.292249	10/651	669,1066,2166,2180,3101,4051,51660,56898,64087,79746	BPGM,CES1,FAAH,ACSL1,HK3,CYP4F3,MPC1,BDH2,MCCC2,ECHDC3
2_Member	GO Biological Processes	GO:1901568	fatty acid derivative metabolic process	-2.95439	-0.166761	5/172	2166,2180,4051,7097,56898	FAAH,ACSL1,CYP4F3,TLR2,BDH2
2_Member	GO Biological Processes	GO:0016054	organic acid catabolic process	-2.81252	-0.106197	6/274	2166,3074,4051,10295,56898,64087	FAAH,HEXB,CYP4F3,BCKDK,BDH2,MCCC2
2_Member	GO Biological Processes	GO:0046395	carboxylic acid catabolic process	-2.81252	-0.106197	6/274	2166,3074,4051,10295,56898,64087	FAAH,HEXB,CYP4F3,BCKDK,BDH2,MCCC2
2_Member	Reactome Gene Sets	R-HSA-556833	metabolism of lipids	-2.72255	-0.0566612	10/739	414,2166,2180,3074,4051,54947,56898,79887,83930,162466	ARSD,FAAH,ACSL1,HEXB,CYP4F3,LPCAT2,BDH2,PLBD1,STARD3NL,PHOSPHO1
2_Member	GO Biological Processes	GO:0016042	lipid catabolic process	-2.40521	0	6/331	1066,2166,3074,4051,56898,79887	CES1,FAAH,HEXB,CYP4F3,BDH2,PLBD1
2_Member	GO Biological Processes	GO:0006631	fatty acid metabolic process	-2.10347	0	6/383	1066,2166,2180,4051,56898,79746	CES1,FAAH,ACSL1,CYP4F3,BDH2,ECHDC3
3_Summary	GO Biological Processes	GO:0090407	organophosphate biosynthetic process	-4.11422	-0.971205	12/700	515,669,1537,2180,2539,3074,3101,4860,7083,51660,54947,162466,7384,64087,51074,645,56898,23509,83857,535,9246,7171,10313	ATP5PB,BPGM,CYC1,ACSL1,G6PD,HEXB,HK3,PNP,TK1,MPC1,LPCAT2,PHOSPHO1,UQCRC1,MCCC2,APIP,BLVRB,BDH2,POFUT1,TMTC1,ATP6V0A1,UBE2L6,TPM4,RTN3
3_Member	GO Biological Processes	GO:0090407	organophosphate biosynthetic process	-4.11422	-0.971205	12/700	515,669,1537,2180,2539,3074,3101,4860,7083,51660,54947,162466	ATP5PB,BPGM,CYC1,ACSL1,G6PD,HEXB,HK3,PNP,TK1,MPC1,LPCAT2,PHOSPHO1
3_Member	GO Biological Processes	GO:1901293	nucleoside phosphate biosynthetic process	-3.41055	-0.379062	8/389	515,669,1537,2180,3101,4860,7083,51660	ATP5PB,BPGM,CYC1,ACSL1,HK3,PNP,TK1,MPC1
3_Member	GO Biological Processes	GO:0006753	nucleoside phosphate metabolic process	-3.39714	-0.379062	11/717	515,669,1537,2180,2539,3101,4860,7083,7384,51660,64087	ATP5PB,BPGM,CYC1,ACSL1,G6PD,HK3,PNP,TK1,UQCRC1,MPC1,MCCC2
3_Member	GO Biological Processes	GO:0046390	ribose phosphate biosynthetic process	-3.37536	-0.378478	7/299	515,669,1537,2180,2539,3101,51660	ATP5PB,BPGM,CYC1,ACSL1,G6PD,HK3,MPC1
3_Member	GO Biological Processes	GO:0072521	purine-containing compound metabolic process	-3.33572	-0.359033	10/613	515,669,1537,2180,3101,4860,7384,51074,51660,64087	ATP5PB,BPGM,CYC1,ACSL1,HK3,PNP,UQCRC1,APIP,MPC1,MCCC2
3_Member	GO Biological Processes	GO:0072522	purine-containing compound biosynthetic process	-3.25718	-0.336016	7/313	515,669,1537,2180,3101,4860,51660	ATP5PB,BPGM,CYC1,ACSL1,HK3,PNP,MPC1
3_Member	GO Biological Processes	GO:0006163	purine nucleotide metabolic process	-2.91311	-0.145101	9/577	515,669,1537,2180,3101,4860,7384,51660,64087	ATP5PB,BPGM,CYC1,ACSL1,HK3,PNP,UQCRC1,MPC1,MCCC2
3_Member	GO Biological Processes	GO:0019693	ribose phosphate metabolic process	-2.9079	-0.145101	9/578	515,669,1537,2180,2539,3101,7384,51660,64087	ATP5PB,BPGM,CYC1,ACSL1,G6PD,HK3,UQCRC1,MPC1,MCCC2
3_Member	GO Biological Processes	GO:0009117	nucleotide metabolic process	-2.85054	-0.116877	10/710	515,669,1537,2180,2539,3101,4860,7384,51660,64087	ATP5PB,BPGM,CYC1,ACSL1,G6PD,HK3,PNP,UQCRC1,MPC1,MCCC2
3_Member	GO Biological Processes	GO:0009152	purine ribonucleotide biosynthetic process	-2.77281	-0.0769554	6/279	515,669,1537,2180,3101,51660	ATP5PB,BPGM,CYC1,ACSL1,HK3,MPC1
3_Member	GO Biological Processes	GO:0051186	cofactor metabolic process	-2.75231	-0.0666757	9/609	645,669,2180,2539,3101,51074,51660,56898,64087	BLVRB,BPGM,ACSL1,G6PD,HK3,APIP,MPC1,BDH2,MCCC2
3_Member	GO Biological Processes	GO:0009165	nucleotide biosynthetic process	-2.7368	-0.0611516	7/385	515,669,1537,2180,3101,4860,51660	ATP5PB,BPGM,CYC1,ACSL1,HK3,PNP,MPC1
3_Member	GO Biological Processes	GO:0072524	pyridine-containing compound metabolic process	-2.67586	-0.0356117	5/199	669,2539,3101,4860,51660	BPGM,G6PD,HK3,PNP,MPC1
3_Member	GO Biological Processes	GO:0009260	ribonucleotide biosynthetic process	-2.67348	-0.0356117	6/292	515,669,1537,2180,3101,51660	ATP5PB,BPGM,CYC1,ACSL1,HK3,MPC1
3_Member	GO Biological Processes	GO:0006164	purine nucleotide biosynthetic process	-2.61498	-0.0119689	6/300	515,669,1537,2180,3101,51660	ATP5PB,BPGM,CYC1,ACSL1,HK3,MPC1
3_Member	GO Biological Processes	GO:0006732	coenzyme metabolic process	-2.60151	-0.0119689	7/407	669,2180,2539,3101,51074,51660,64087	BPGM,ACSL1,G6PD,HK3,APIP,MPC1,MCCC2
3_Member	GO Biological Processes	GO:0009124	nucleoside monophosphate biosynthetic process	-2.59269	-0.0119689	5/208	515,669,1537,3101,7083	ATP5PB,BPGM,CYC1,HK3,TK1
3_Member	GO Biological Processes	GO:1901137	carbohydrate derivative biosynthetic process	-2.57704	-0.0119689	10/774	515,669,1537,2180,2539,3101,7083,23509,51660,83857	ATP5PB,BPGM,CYC1,ACSL1,G6PD,HK3,TK1,POFUT1,MPC1,TMTC1
3_Member	KEGG Pathway	hsa00190	oxidative phosphorylation	-2.50475	0	4/133	515,535,1537,7384	ATP5PB,ATP6V0A1,CYC1,UQCRC1
3_Member	GO Biological Processes	GO:0009150	purine ribonucleotide metabolic process	-2.48978	0	8/543	515,669,1537,2180,3101,7384,51660,64087	ATP5PB,BPGM,CYC1,ACSL1,HK3,UQCRC1,MPC1,MCCC2
3_Member	GO Biological Processes	GO:0009259	ribonucleotide metabolic process	-2.4185	0	8/558	515,669,1537,2180,3101,7384,51660,64087	ATP5PB,BPGM,CYC1,ACSL1,HK3,UQCRC1,MPC1,MCCC2
3_Member	KEGG Pathway	hsa05012	Parkinson's disease	-2.40314	0	4/142	515,1537,7384,9246	ATP5PB,CYC1,UQCRC1,UBE2L6
3_Member	KEGG Pathway	hsa04260	cardiac muscle contraction	-2.27416	0	3/78	1537,7171,7384	CYC1,TPM4,UQCRC1
3_Member	GO Biological Processes	GO:0006754	ATP biosynthetic process	-2.22047	0	4/160	515,669,1537,3101	ATP5PB,BPGM,CYC1,HK3
3_Member	GO Biological Processes	GO:0006790	sulfur compound metabolic process	-2.15728	0	6/373	2180,2539,3074,51074,51660,64087	ACSL1,G6PD,HEXB,APIP,MPC1,MCCC2
3_Member	GO Biological Processes	GO:0009123	nucleoside monophosphate metabolic process	-2.13554	0	6/377	515,669,1537,3101,7083,7384	ATP5PB,BPGM,CYC1,HK3,TK1,UQCRC1
3_Member	GO Biological Processes	GO:0009206	purine ribonucleoside triphosphate biosynthetic process	-2.12022	0	4/171	515,669,1537,3101	ATP5PB,BPGM,CYC1,HK3
3_Member	KEGG Pathway	hsa05010	Alzheimer's disease	-2.12022	0	4/171	515,1537,7384,10313	ATP5PB,CYC1,UQCRC1,RTN3
3_Member	GO Biological Processes	GO:0009145	purine nucleoside triphosphate biosynthetic process	-2.11149	0	4/172	515,669,1537,3101	ATP5PB,BPGM,CYC1,HK3
3_Member	Reactome Gene Sets	R-HSA-1428517	the citric acid (TCA) cycle and respiratory electron transport	-2.07713	0	4/176	515,1537,7384,51660	ATP5PB,CYC1,UQCRC1,MPC1
3_Member	GO Biological Processes	GO:0009201	ribonucleoside triphosphate biosynthetic process	-2.06868	0	4/177	515,669,1537,3101	ATP5PB,BPGM,CYC1,HK3
3_Member	GO Biological Processes	GO:0009127	purine nucleoside monophosphate biosynthetic process	-2.01916	0	4/183	515,669,1537,3101	ATP5PB,BPGM,CYC1,HK3
3_Member	GO Biological Processes	GO:0009168	purine ribonucleoside monophosphate biosynthetic process	-2.01916	0	4/183	515,669,1537,3101	ATP5PB,BPGM,CYC1,HK3
4_Summary	GO Biological Processes	GO:0061515	myeloid cell development	-3.56768	-0.452693	4/69	669,2539,7097,79705	BPGM,G6PD,TLR2,LRRK1
4_Member	GO Biological Processes	GO:0061515	myeloid cell development	-3.56768	-0.452693	4/69	669,2539,7097,79705	BPGM,G6PD,TLR2,LRRK1
5_Summary	GO Biological Processes	GO:0044550	secondary metabolite biosynthetic process	-3.47883	-0.390169	3/30	9693,26060,56898,645	RAPGEF2,APPL1,BDH2,BLVRB
5_Member	GO Biological Processes	GO:0044550	secondary metabolite biosynthetic process	-3.47883	-0.390169	3/30	9693,26060,56898	RAPGEF2,APPL1,BDH2
5_Member	GO Biological Processes	GO:0042440	pigment metabolic process	-3.45102	-0.387184	4/74	645,9693,26060,56898	BLVRB,RAPGEF2,APPL1,BDH2
5_Member	GO Biological Processes	GO:0019748	secondary metabolic process	-2.42342	0	3/69	9693,26060,56898	RAPGEF2,APPL1,BDH2
6_Summary	GO Biological Processes	GO:0043094	cellular metabolic compound salvage	-3.31606	-0.358678	3/34	4860,7083,51074	PNP,TK1,APIP
6_Member	GO Biological Processes	GO:0043094	cellular metabolic compound salvage	-3.31606	-0.358678	3/34	4860,7083,51074	PNP,TK1,APIP
7_Summary	GO Biological Processes	GO:0097191	extrinsic apoptotic signaling pathway	-3.26433	-0.336016	6/224	1495,4055,8742,8797,26060,282991,695,2934	CTNNA1,LTBR,TNFSF12,TNFRSF10A,APPL1,BLOC1S2,BTK,GSN
7_Member	GO Biological Processes	GO:0097191	extrinsic apoptotic signaling pathway	-3.26433	-0.336016	6/224	1495,4055,8742,8797,26060,282991	CTNNA1,LTBR,TNFSF12,TNFRSF10A,APPL1,BLOC1S2
7_Member	GO Biological Processes	GO:2001238	positive regulation of extrinsic apoptotic signaling pathway	-2.84899	-0.116877	3/49	1495,4055,8742	CTNNA1,LTBR,TNFSF12
7_Member	GO Biological Processes	GO:2001236	regulation of extrinsic apoptotic signaling pathway	-2.24922	0	4/157	1495,4055,8742,8797	CTNNA1,LTBR,TNFSF12,TNFRSF10A
7_Member	GO Biological Processes	GO:0097190	apoptotic signaling pathway	-2.20259	0	8/607	695,1495,2934,4055,8742,8797,26060,282991	BTK,CTNNA1,GSN,LTBR,TNFSF12,TNFRSF10A,APPL1,BLOC1S2
7_Member	GO Biological Processes	GO:2001235	positive regulation of apoptotic signaling pathway	-2.05196	0	4/179	1495,2934,4055,8742	CTNNA1,GSN,LTBR,TNFSF12
8_Summary	GO Biological Processes	GO:0140029	exocytic process	-3.22207	-0.331007	4/85	695,6809,6845,10890,2037,9693,11031,26060,1211,116985,128866,2934	BTK,STX3,VAMP7,RAB10,EPB41L2,RAPGEF2,RAB31,APPL1,CLTA,ARAP1,CHMP4B,GSN
8_Member	GO Biological Processes	GO:0140029	exocytic process	-3.22207	-0.331007	4/85	695,6809,6845,10890	BTK,STX3,VAMP7,RAB10
8_Member	GO Biological Processes	GO:1990778	protein localization to cell periphery	-3.17659	-0.319882	7/323	2037,6809,6845,9693,10890,11031,26060	EPB41L2,STX3,VAMP7,RAPGEF2,RAB10,RAB31,APPL1
8_Member	GO Biological Processes	GO:0043001	Golgi to plasma membrane protein transport	-3.07525	-0.247505	3/41	6845,10890,11031	VAMP7,RAB10,RAB31
8_Member	GO Biological Processes	GO:0098876	vesicle-mediated transport to the plasma membrane	-3.04052	-0.226564	4/95	6809,6845,10890,11031	STX3,VAMP7,RAB10,RAB31
8_Member	GO Biological Processes	GO:0072659	protein localization to plasma membrane	-2.84492	-0.116877	6/270	6809,6845,9693,10890,11031,26060	STX3,VAMP7,RAPGEF2,RAB10,RAB31,APPL1
8_Member	GO Biological Processes	GO:0006893	Golgi to plasma membrane transport	-2.5752	-0.0119689	3/61	6845,10890,11031	VAMP7,RAB10,RAB31
8_Member	GO Biological Processes	GO:0061951	establishment of protein localization to plasma membrane	-2.5752	-0.0119689	3/61	6845,10890,11031	VAMP7,RAB10,RAB31
8_Member	KEGG Pathway	hsa04144	endocytosis	-2.18364	0	5/260	1211,10890,11031,116985,128866	CLTA,RAB10,RAB31,ARAP1,CHMP4B
8_Member	GO Biological Processes	GO:0072657	protein localization to membrane	-2.12921	0	8/625	2934,6809,6845,9693,10890,11031,26060,128866	GSN,STX3,VAMP7,RAPGEF2,RAB10,RAB31,APPL1,CHMP4B
9_Summary	GO Biological Processes	GO:0002521	leukocyte differentiation	-3.21875	-0.331007	9/522	695,1378,2177,4055,4860,7097,29887,79705,115352,2934,6845,201633,23303	BTK,CR1,FANCD2,LTBR,PNP,TLR2,SNX10,LRRK1,FCRL3,GSN,VAMP7,TIGIT,KIF13B
9_Member	GO Biological Processes	GO:0002521	leukocyte differentiation	-3.21875	-0.331007	9/522	695,1378,2177,4055,4860,7097,29887,79705,115352	BTK,CR1,FANCD2,LTBR,PNP,TLR2,SNX10,LRRK1,FCRL3
9_Member	GO Biological Processes	GO:0045619	regulation of lymphocyte differentiation	-2.95439	-0.166761	5/172	695,1378,2177,4860,115352	BTK,CR1,FANCD2,PNP,FCRL3
9_Member	GO Biological Processes	GO:0002694	regulation of leukocyte activation	-2.28339	0	8/588	695,1378,2177,2934,4860,6845,115352,201633	BTK,CR1,FANCD2,GSN,PNP,VAMP7,FCRL3,TIGIT
9_Member	GO Biological Processes	GO:0046649	lymphocyte activation	-2.16773	0	9/748	695,1378,2177,2934,4860,6845,23303,115352,201633	BTK,CR1,FANCD2,GSN,PNP,VAMP7,KIF13B,FCRL3,TIGIT
9_Member	GO Biological Processes	GO:0051249	regulation of lymphocyte activation	-2.11442	0	7/501	695,1378,2177,2934,4860,115352,201633	BTK,CR1,FANCD2,GSN,PNP,FCRL3,TIGIT
9_Member	GO Biological Processes	GO:0050865	regulation of cell activation	-2.10146	0	8/632	695,1378,2177,2934,4860,6845,115352,201633	BTK,CR1,FANCD2,GSN,PNP,VAMP7,FCRL3,TIGIT
9_Member	GO Biological Processes	GO:1902105	regulation of leukocyte differentiation	-2.0458	0	5/281	695,1378,2177,4860,115352	BTK,CR1,FANCD2,PNP,FCRL3
10_Summary	GO Biological Processes	GO:0001501	skeletal system development	-3.17759	-0.319882	9/529	871,2114,2201,3074,6678,10522,79648,79705,162466	SERPINH1,ETS2,FBN2,HEXB,SPARC,DEAF1,MCPH1,LRRK1,PHOSPHO1
10_Member	GO Biological Processes	GO:0001501	skeletal system development	-3.17759	-0.319882	9/529	871,2114,2201,3074,6678,10522,79648,79705,162466	SERPINH1,ETS2,FBN2,HEXB,SPARC,DEAF1,MCPH1,LRRK1,PHOSPHO1
10_Member	GO Biological Processes	GO:0060348	bone development	-2.49662	0	5/219	871,6678,79648,79705,162466	SERPINH1,SPARC,MCPH1,LRRK1,PHOSPHO1
11_Summary	GO Biological Processes	GO:0032655	regulation of interleukin-12 production	-2.68151	-0.0356117	3/56	3663,7097,201633,7520,9246,2180	IRF5,TLR2,TIGIT,XRCC5,UBE2L6,ACSL1
11_Member	GO Biological Processes	GO:0032655	regulation of interleukin-12 production	-2.68151	-0.0356117	3/56	3663,7097,201633	IRF5,TLR2,TIGIT
11_Member	GO Biological Processes	GO:0032615	interleukin-12 production	-2.63779	-0.0119689	3/58	3663,7097,201633	IRF5,TLR2,TIGIT
11_Member	GO Biological Processes	GO:0032479	regulation of type I interferon production	-2.57695	-0.0119689	4/127	3663,7097,7520,9246	IRF5,TLR2,XRCC5,UBE2L6
11_Member	GO Biological Processes	GO:0032606	type I interferon production	-2.55246	0	4/129	3663,7097,7520,9246	IRF5,TLR2,XRCC5,UBE2L6
11_Member	GO Biological Processes	GO:0032481	positive regulation of type I interferon production	-2.28979	0	3/77	3663,7097,7520	IRF5,TLR2,XRCC5
11_Member	GO Biological Processes	GO:0070542	response to fatty acid	-2.14281	0	3/87	2180,7097,7520	ACSL1,TLR2,XRCC5
12_Summary	Canonical Pathways	M58	PID AR pathway	-2.5752	-0.0119689	3/61	2934,7520,26060,8797,51074	GSN,XRCC5,APPL1,TNFRSF10A,APIP
12_Member	Canonical Pathways	M58	PID AR pathway	-2.5752	-0.0119689	3/61	2934,7520,26060	GSN,XRCC5,APPL1
12_Member	Reactome Gene Sets	R-HSA-109581	apoptosis	-2.04368	0	4/180	2934,8797,26060,51074	GSN,TNFRSF10A,APPL1,APIP
12_Member	Reactome Gene Sets	R-HSA-5357801	programmed cell death	-2.00308	0	4/185	2934,8797,26060,51074	GSN,TNFRSF10A,APPL1,APIP
13_Summary	KEGG Pathway	hsa04721	synaptic vesicle cycle	-2.5353	0	3/63	535,1211,6809	ATP6V0A1,CLTA,STX3
13_Member	KEGG Pathway	hsa04721	synaptic vesicle cycle	-2.5353	0	3/63	535,1211,6809	ATP6V0A1,CLTA,STX3
14_Summary	GO Biological Processes	GO:1901652	response to peptide	-2.53383	0	8/534	535,1537,3663,6678,7097,10890,11031,26060,115352,695,6845,1378,2177,79648	ATP6V0A1,CYC1,IRF5,SPARC,TLR2,RAB10,RAB31,APPL1,FCRL3,BTK,VAMP7,CR1,FANCD2,MCPH1
14_Member	GO Biological Processes	GO:1901652	response to peptide	-2.53383	0	8/534	535,1537,3663,6678,7097,10890,11031,26060	ATP6V0A1,CYC1,IRF5,SPARC,TLR2,RAB10,RAB31,APPL1
14_Member	GO Biological Processes	GO:0043434	response to peptide hormone	-2.39909	0	7/443	535,1537,6678,7097,10890,11031,26060	ATP6V0A1,CYC1,SPARC,TLR2,RAB10,RAB31,APPL1
14_Member	GO Biological Processes	GO:0034121	regulation of toll-like receptor signaling pathway	-2.32171	0	3/75	7097,26060,115352	TLR2,APPL1,FCRL3
14_Member	GO Biological Processes	GO:0050729	positive regulation of inflammatory response	-2.30866	0	4/151	695,6845,7097,26060	BTK,VAMP7,TLR2,APPL1
14_Member	GO Biological Processes	GO:0002224	toll-like receptor signaling pathway	-2.2786	0	4/154	695,7097,26060,115352	BTK,TLR2,APPL1,FCRL3
14_Member	GO Biological Processes	GO:0002532	production of molecular mediator involved in inflammatory response	-2.27416	0	3/78	695,6845,26060	BTK,VAMP7,APPL1
14_Member	GO Biological Processes	GO:0050727	regulation of inflammatory response	-2.08305	0	7/508	695,1378,2177,6845,7097,26060,79648	BTK,CR1,FANCD2,VAMP7,TLR2,APPL1,MCPH1
14_Member	GO Biological Processes	GO:0032868	response to insulin	-2.05837	0	5/279	535,7097,10890,11031,26060	ATP6V0A1,TLR2,RAB10,RAB31,APPL1
14_Member	GO Biological Processes	GO:0050764	regulation of phagocytosis	-2.02579	0	3/96	7097,11031,26060	TLR2,RAB31,APPL1
15_Summary	GO Biological Processes	GO:0051656	establishment of organelle localization	-2.52396	0	8/536	695,6809,6845,55201,79648,83930,128866,282991,10890	BTK,STX3,VAMP7,MAP1S,MCPH1,STARD3NL,CHMP4B,BLOC1S2,RAB10
15_Member	GO Biological Processes	GO:0051656	establishment of organelle localization	-2.52396	0	8/536	695,6809,6845,55201,79648,83930,128866,282991	BTK,STX3,VAMP7,MAP1S,MCPH1,STARD3NL,CHMP4B,BLOC1S2
15_Member	GO Biological Processes	GO:0032418	lysosome localization	-2.32171	0	3/75	695,6845,282991	BTK,VAMP7,BLOC1S2
15_Member	GO Biological Processes	GO:0051640	organelle localization	-2.22698	0	9/732	695,6809,6845,10890,55201,79648,83930,128866,282991	BTK,STX3,VAMP7,RAB10,MAP1S,MCPH1,STARD3NL,CHMP4B,BLOC1S2
15_Member	GO Biological Processes	GO:0072384	organelle transport along microtubule	-2.17066	0	3/85	6845,55201,282991	VAMP7,MAP1S,BLOC1S2
16_Summary	GO Biological Processes	GO:0046470	phosphatidylcholine metabolic process	-2.19924	0	3/83	54947,79887,162466	LPCAT2,PLBD1,PHOSPHO1
16_Member	GO Biological Processes	GO:0046470	phosphatidylcholine metabolic process	-2.19924	0	3/83	54947,79887,162466	LPCAT2,PLBD1,PHOSPHO1
17_Summary	GO Biological Processes	GO:0022604	regulation of cell morphogenesis	-2.1054	0	7/503	3074,6678,6845,9693,9706,23303,116985	HEXB,SPARC,VAMP7,RAPGEF2,ULK2,KIF13B,ARAP1
17_Member	GO Biological Processes	GO:0022604	regulation of cell morphogenesis	-2.1054	0	7/503	3074,6678,6845,9693,9706,23303,116985	HEXB,SPARC,VAMP7,RAPGEF2,ULK2,KIF13B,ARAP1
18_Summary	GO Biological Processes	GO:0046849	bone remodeling	-2.08921	0	3/91	29887,51430,79705,7520,51660	SNX10,SUCO,LRRK1,XRCC5,MPC1
18_Member	GO Biological Processes	GO:0046849	bone remodeling	-2.08921	0	3/91	29887,51430,79705	SNX10,SUCO,LRRK1
18_Member	GO Biological Processes	GO:1990823	response to leukemia inhibitory factor	-2.01355	0	3/97	7520,29887,51660	XRCC5,SNX10,MPC1
18_Member	GO Biological Processes	GO:1990830	cellular response to leukemia inhibitory factor	-2.01355	0	3/97	7520,29887,51660	XRCC5,SNX10,MPC1
19_Summary	KEGG Pathway	hsa05146	amoebiasis	-2.02579	0	3/96	3915,5269,7097	LAMC1,SERPINB6,TLR2
19_Member	KEGG Pathway	hsa05146	amoebiasis	-2.02579	0	3/96	3915,5269,7097	LAMC1,SERPINB6,TLR2

## Sheet: Hyper-Down
Supplementary Table 4. Biological process and pathway categories of DEGs with ac4C hyper or hypo.
ac4C Hyper-Down gene set.
GroupID	Category	Term	Description	LogP	Log(q-value)	InTerm_InList	Genes	Symbols
1_Summary	KEGG Pathway	hsa04020	calcium signaling pathway	-3.01649	0	3/182	489,8911,23236	ATP2A3,CACNA1I,PLCB1
1_Member	KEGG Pathway	hsa04020	calcium signaling pathway	-3.01649	0	3/182	489,8911,23236	ATP2A3,CACNA1I,PLCB1
1_Member	GO Biological Processes	GO:0070588	calcium ion transmembrane transport	-2.28732	0	3/329	489,8911,23236	ATP2A3,CACNA1I,PLCB1
2_Summary	GO Biological Processes	GO:0051056	regulation of small GTPase mediated signal transduction	-2.336	0	3/316	50861,54509,64857	STMN3,RHOF,PLEKHG2
2_Member	GO Biological Processes	GO:0051056	regulation of small GTPase mediated signal transduction	-2.336	0	3/316	50861,54509,64857	STMN3,RHOF,PLEKHG2

## Sheet: Hypo-Down
Supplementary Table 4. Biological process and pathway categories of DEGs with ac4C hyper or hypo.
ac4C Hypo-Down gene set.
GroupID	Category	Term	Description	LogP	Log(q-value)	InTerm_InList	Genes	Symbols
1_Summary	GO Biological Processes	GO:0060831	smoothened signaling pathway involved in dorsal/ventral neural tube patterning	-5.44749	-1.12838	3/14	5727,57728,221322,5217,6792,23043,65250,95681,117178,84976	PTCH1,WDR19,TBC1D32,PFN2,CDKL5,TNIK,CPLANE1,CEP41,SSX2IP,DISP1
1_Member	GO Biological Processes	GO:0060831	smoothened signaling pathway involved in dorsal/ventral neural tube patterning	-5.44749	-1.12838	3/14	5727,57728,221322	PTCH1,WDR19,TBC1D32
1_Member	GO Biological Processes	GO:0021904	dorsal/ventral neural tube patterning	-4.70912	-0.691046	3/24	5727,57728,221322	PTCH1,WDR19,TBC1D32
1_Member	GO Biological Processes	GO:0120031	plasma membrane bounded cell projection assembly	-4.39085	-0.680774	8/590	5217,6792,23043,57728,65250,95681,117178,221322	PFN2,CDKL5,TNIK,WDR19,CPLANE1,CEP41,SSX2IP,TBC1D32
1_Member	GO Biological Processes	GO:0030031	cell projection assembly	-4.32412	-0.680774	8/603	5217,6792,23043,57728,65250,95681,117178,221322	PFN2,CDKL5,TNIK,WDR19,CPLANE1,CEP41,SSX2IP,TBC1D32
1_Member	GO Biological Processes	GO:0009953	dorsal/ventral pattern formation	-4.30091	-0.680774	4/92	5727,57728,84976,221322	PTCH1,WDR19,DISP1,TBC1D32
1_Member	GO Biological Processes	GO:0021532	neural tube patterning	-3.99902	-0.583007	3/41	5727,57728,221322	PTCH1,WDR19,TBC1D32
1_Member	GO Biological Processes	GO:0030326	embryonic limb morphogenesis	-3.75747	-0.479753	4/127	5727,57728,65250,221322	PTCH1,WDR19,CPLANE1,TBC1D32
1_Member	GO Biological Processes	GO:0035113	embryonic appendage morphogenesis	-3.75747	-0.479753	4/127	5727,57728,65250,221322	PTCH1,WDR19,CPLANE1,TBC1D32
1_Member	GO Biological Processes	GO:0060271	cilium assembly	-3.67976	-0.459992	6/391	6792,57728,65250,95681,117178,221322	CDKL5,WDR19,CPLANE1,CEP41,SSX2IP,TBC1D32
1_Member	GO Biological Processes	GO:0044782	cilium organization	-3.57478	-0.428253	6/409	6792,57728,65250,95681,117178,221322	CDKL5,WDR19,CPLANE1,CEP41,SSX2IP,TBC1D32
1_Member	GO Biological Processes	GO:0061512	protein localization to cilium	-3.57127	-0.428253	3/57	57728,65250,221322	WDR19,CPLANE1,TBC1D32
1_Member	GO Biological Processes	GO:0035107	appendage morphogenesis	-3.48126	-0.392606	4/150	5727,57728,65250,221322	PTCH1,WDR19,CPLANE1,TBC1D32
1_Member	GO Biological Processes	GO:0035108	limb morphogenesis	-3.48126	-0.392606	4/150	5727,57728,65250,221322	PTCH1,WDR19,CPLANE1,TBC1D32
1_Member	GO Biological Processes	GO:0048736	appendage development	-3.18264	-0.205959	4/180	5727,57728,65250,221322	PTCH1,WDR19,CPLANE1,TBC1D32
1_Member	GO Biological Processes	GO:0060173	limb development	-3.18264	-0.205959	4/180	5727,57728,65250,221322	PTCH1,WDR19,CPLANE1,TBC1D32
1_Member	GO Biological Processes	GO:0007224	smoothened signaling pathway	-2.43362	0	3/141	5727,57728,221322	PTCH1,WDR19,TBC1D32
1_Member	GO Biological Processes	GO:0021915	neural tube development	-2.25813	0	3/163	5727,57728,221322	PTCH1,WDR19,TBC1D32
1_Member	GO Biological Processes	GO:0003002	regionalization	-2.12206	0	4/354	5727,57728,84976,221322	PTCH1,WDR19,DISP1,TBC1D32
2_Summary	GO Biological Processes	GO:0048246	macrophage chemotaxis	-4.09862	-0.583007	3/38	4485,6348,7057	MST1,CCL3,THBS1
2_Member	GO Biological Processes	GO:0048246	macrophage chemotaxis	-4.09862	-0.583007	3/38	4485,6348,7057	MST1,CCL3,THBS1
2_Member	GO Biological Processes	GO:1905521	regulation of macrophage migration	-4.03135	-0.583007	3/40	4485,6348,7057	MST1,CCL3,THBS1
2_Member	GO Biological Processes	GO:1905517	macrophage migration	-3.66516	-0.459992	3/53	4485,6348,7057	MST1,CCL3,THBS1
2_Member	GO Biological Processes	GO:0002688	regulation of leukocyte chemotaxis	-2.66259	0	3/117	4485,6348,7057	MST1,CCL3,THBS1
3_Summary	GO Biological Processes	GO:0010633	negative regulation of epithelial cell migration	-3.9091	-0.544241	4/116	493,5217,7057,83481,5727,7049,4485,6792	ATP2B4,PFN2,THBS1,EPPK1,PTCH1,TGFBR3,MST1,CDKL5
3_Member	GO Biological Processes	GO:0010633	negative regulation of epithelial cell migration	-3.9091	-0.544241	4/116	493,5217,7057,83481	ATP2B4,PFN2,THBS1,EPPK1
3_Member	GO Biological Processes	GO:0050680	negative regulation of epithelial cell proliferation	-3.26621	-0.205959	4/171	5727,7049,7057,83481	PTCH1,TGFBR3,THBS1,EPPK1
3_Member	GO Biological Processes	GO:0051271	negative regulation of cellular component movement	-2.78933	0	5/390	493,5217,7049,7057,83481	ATP2B4,PFN2,TGFBR3,THBS1,EPPK1
3_Member	GO Biological Processes	GO:0050678	regulation of epithelial cell proliferation	-2.7603	0	5/396	4485,5727,7049,7057,83481	MST1,PTCH1,TGFBR3,THBS1,EPPK1
3_Member	GO Biological Processes	GO:0050673	epithelial cell proliferation	-2.49946	0	5/455	4485,5727,7049,7057,83481	MST1,PTCH1,TGFBR3,THBS1,EPPK1
3_Member	GO Biological Processes	GO:0010632	regulation of epithelial cell migration	-2.38876	0	4/297	493,5217,7057,83481	ATP2B4,PFN2,THBS1,EPPK1
3_Member	GO Biological Processes	GO:0090288	negative regulation of cellular response to growth factor stimulus	-2.22186	0	3/168	493,7049,7057	ATP2B4,TGFBR3,THBS1
3_Member	GO Biological Processes	GO:0030336	negative regulation of cell migration	-2.17829	0	4/341	493,5217,7057,83481	ATP2B4,PFN2,THBS1,EPPK1
3_Member	GO Biological Processes	GO:0048638	regulation of developmental growth	-2.1391	0	4/350	5727,6792,7049,83481	PTCH1,CDKL5,TGFBR3,EPPK1
3_Member	GO Biological Processes	GO:2000146	negative regulation of cell motility	-2.11362	0	4/356	493,5217,7057,83481	ATP2B4,PFN2,THBS1,EPPK1
3_Member	GO Biological Processes	GO:0010631	epithelial cell migration	-2.10107	0	4/359	493,5217,7057,83481	ATP2B4,PFN2,THBS1,EPPK1
3_Member	GO Biological Processes	GO:0090132	epithelium migration	-2.08864	0	4/362	493,5217,7057,83481	ATP2B4,PFN2,THBS1,EPPK1
3_Member	GO Biological Processes	GO:0090130	tissue migration	-2.06414	0	4/368	493,5217,7057,83481	ATP2B4,PFN2,THBS1,EPPK1
3_Member	GO Biological Processes	GO:0031099	regeneration	-2.02065	0	3/199	5727,7049,83481	PTCH1,TGFBR3,EPPK1
4_Summary	GO Biological Processes	GO:0043010	camera-type eye development	-3.22715	-0.205959	5/311	493,4094,25945,57728,221322,5727,23043	ATP2B4,MAF,NECTIN3,WDR19,TBC1D32,PTCH1,TNIK
4_Member	GO Biological Processes	GO:0043010	camera-type eye development	-3.22715	-0.205959	5/311	493,4094,25945,57728,221322	ATP2B4,MAF,NECTIN3,WDR19,TBC1D32
4_Member	GO Biological Processes	GO:0002088	lens development in camera-type eye	-3.18676	-0.205959	3/77	4094,25945,221322	MAF,NECTIN3,TBC1D32
4_Member	GO Biological Processes	GO:1990778	protein localization to cell periphery	-3.15301	-0.195635	5/323	493,5727,23043,25945,57728	ATP2B4,PTCH1,TNIK,NECTIN3,WDR19
4_Member	GO Biological Processes	GO:0001654	eye development	-2.93727	-0.0283317	5/361	493,4094,25945,57728,221322	ATP2B4,MAF,NECTIN3,WDR19,TBC1D32
4_Member	GO Biological Processes	GO:0150063	visual system development	-2.91607	-0.0283317	5/365	493,4094,25945,57728,221322	ATP2B4,MAF,NECTIN3,WDR19,TBC1D32
4_Member	GO Biological Processes	GO:0048880	sensory system development	-2.88995	-0.017998	5/370	493,4094,25945,57728,221322	ATP2B4,MAF,NECTIN3,WDR19,TBC1D32
4_Member	GO Biological Processes	GO:0072659	protein localization to plasma membrane	-2.53637	0	4/270	493,5727,23043,25945	ATP2B4,PTCH1,TNIK,NECTIN3
4_Member	GO Biological Processes	GO:0060041	retina development in camera-type eye	-2.44229	0	3/140	493,25945,221322	ATP2B4,NECTIN3,TBC1D32
4_Member	GO Biological Processes	GO:0007423	sensory organ development	-2.14089	0	5/554	493,4094,25945,57728,221322	ATP2B4,MAF,NECTIN3,WDR19,TBC1D32
5_Summary	GO Biological Processes	GO:0070509	calcium ion import	-3.12261	-0.183716	3/81	493,6348,79085	ATP2B4,CCL3,SLC25A23
5_Member	GO Biological Processes	GO:0070509	calcium ion import	-3.12261	-0.183716	3/81	493,6348,79085	ATP2B4,CCL3,SLC25A23
5_Member	GO Biological Processes	GO:0060401	cytosolic calcium ion transport	-2.13945	0	3/180	493,6348,79085	ATP2B4,CCL3,SLC25A23
6_Summary	GO Biological Processes	GO:0006869	lipid transport	-2.91607	-0.0283317	5/365	5727,7057,26207,81537,374868,79085	PTCH1,THBS1,PITPNC1,SGPP1,ATP9B,SLC25A23
6_Member	GO Biological Processes	GO:0006869	lipid transport	-2.91607	-0.0283317	5/365	5727,7057,26207,81537,374868	PTCH1,THBS1,PITPNC1,SGPP1,ATP9B
6_Member	GO Biological Processes	GO:0015748	organophosphate ester transport	-2.79684	0	3/105	26207,79085,374868	PITPNC1,SLC25A23,ATP9B
6_Member	GO Biological Processes	GO:0010876	lipid localization	-2.7177	0	5/405	5727,7057,26207,81537,374868	PTCH1,THBS1,PITPNC1,SGPP1,ATP9B
7_Summary	GO Biological Processes	GO:1901606	alpha-amino acid catabolic process	-2.79684	0	3/105	493,3712,11112	ATP2B4,IVD,HIBADH
7_Member	GO Biological Processes	GO:1901606	alpha-amino acid catabolic process	-2.79684	0	3/105	493,3712,11112	ATP2B4,IVD,HIBADH
7_Member	GO Biological Processes	GO:0009063	cellular amino acid catabolic process	-2.58105	0	3/125	493,3712,11112	ATP2B4,IVD,HIBADH
8_Summary	GO Biological Processes	GO:0030856	regulation of epithelial cell differentiation	-2.28049	0	3/160	5727,9575,81537,493,6348,9063	PTCH1,CLOCK,SGPP1,ATP2B4,CCL3,PIAS2
8_Member	GO Biological Processes	GO:0030856	regulation of epithelial cell differentiation	-2.28049	0	3/160	5727,9575,81537	PTCH1,CLOCK,SGPP1
8_Member	GO Biological Processes	GO:0071407	cellular response to organic cyclic compound	-2.17346	0	5/544	493,5727,6348,9063,9575	ATP2B4,PTCH1,CCL3,PIAS2,CLOCK
9_Summary	GO Biological Processes	GO:0046578	regulation of Ras protein signal transduction	-2.11979	0	3/183	9265,9639,117178	CYTH3,ARHGEF10,SSX2IP
9_Member	GO Biological Processes	GO:0046578	regulation of Ras protein signal transduction	-2.11979	0	3/183	9265,9639,117178	CYTH3,ARHGEF10,SSX2IP
